# Supplementary material for: Tricarbonylrhenium(i) complexes with 2-acetylpyridine-derived hydrazones are cytotoxic to NCI-H460 human large cell lung cancer
Source: Royal Society of Chemistry journal article supplement (doi:10.1039/c6nj00050a), 2016-01-01

New Journal of Chemistry

May 12<sup>th</sup>, 2016

Supplementary material for

**Tricarbonylrhenium(I) complexes with 2-acetylpyridine-derived hydrazones are cytotoxic to NCI-H460 human large cell lung cancer**

Camila Vargas Garcia<sup>a</sup>, Gabrieli Lessa Parrilha<sup>a</sup>, Bernardo Lages Rodrigues<sup>a</sup>, Sarah Fernandes Teixeira<sup>b</sup>, Ricardo Alexandre de Azevedo<sup>b</sup>, Adilson Kleber Ferreira<sup>b</sup>, Heloisa Beraldo<sup>a</sup>

<sup>a</sup> *Departamento de Química, Instituto de Ciências Exatas, Universidade Federal de Minas Gerais, 31270-901, Belo Horizonte, MG, Brazil*

<sup>b</sup> *Departamento de Imunologia, Instituto de Ciências Biomédicas, Universidade de São Paulo, 05508-900, São Paulo, SP, Brazil*

\* *hberaldo@ufmg.br*

## Table of contents

|                                                                                                                                                                                                                                                                                                                                                                 |    |
|-----------------------------------------------------------------------------------------------------------------------------------------------------------------------------------------------------------------------------------------------------------------------------------------------------------------------------------------------------------------|----|
| Infrared spectra of complexes [ReCl(CO) <sub>3</sub> (H <sub>2</sub> AcPh)] ( <b>1</b> ), [ReCl(CO) <sub>3</sub> (H <sub>2</sub> Ac <i>p</i> ClPh)]·0.5C <sub>7</sub> H <sub>8</sub> ( <b>2</b> ) and [ReCl(CO) <sub>3</sub> (H <sub>2</sub> Ac <i>p</i> NO <sub>2</sub> Ph)]·0.5C <sub>7</sub> H <sub>8</sub> ( <b>3</b> ) .....                               | 2  |
| <sup>1</sup> H and <sup>13</sup> C NMR spectra of complexes [ReCl(CO) <sub>3</sub> (H <sub>2</sub> AcPh)] ( <b>1</b> ), [ReCl(CO) <sub>3</sub> (H <sub>2</sub> Ac <i>p</i> ClPh)]·0.5C <sub>7</sub> H <sub>8</sub> ( <b>2</b> ) and [ReCl(CO) <sub>3</sub> (H <sub>2</sub> Ac <i>p</i> NO <sub>2</sub> Ph)]·0.5C <sub>7</sub> H <sub>8</sub> ( <b>3</b> ) ..... | 6  |
| CHECKCIFs files of complexes [ReCl(CO) <sub>3</sub> (H <sub>2</sub> AcPh)] ( <b>1</b> ), [ReCl(CO) <sub>3</sub> (H <sub>2</sub> Ac <i>p</i> ClPh)]·DMSO ( <b>2a</b> ) and [ReCl(CO) <sub>3</sub> (H <sub>2</sub> Ac <i>p</i> NO <sub>2</sub> Ph)]·DMSO ( <b>3a</b> ) .....                                                                                      | 23 |

Infrared spectra of complexes  $[\text{ReCl}(\text{CO})_3(\text{H}_2\text{AcPh})]$  (**1**),

$[\text{ReCl}(\text{CO})_3(\text{H}_2\text{Ac}p\text{ClPh})] \cdot 0.5\text{C}_7\text{H}_8$  (**2**) and

$[\text{ReCl}(\text{CO})_3(\text{H}_2\text{Ac}p\text{NO}_2\text{Ph})] \cdot 0.5\text{C}_7\text{H}_8$  (**3**)

Fig. S1 IR spectrum of complex [ReCl(CO)<sub>3</sub>(H<sub>2</sub>AcPh)] (1)

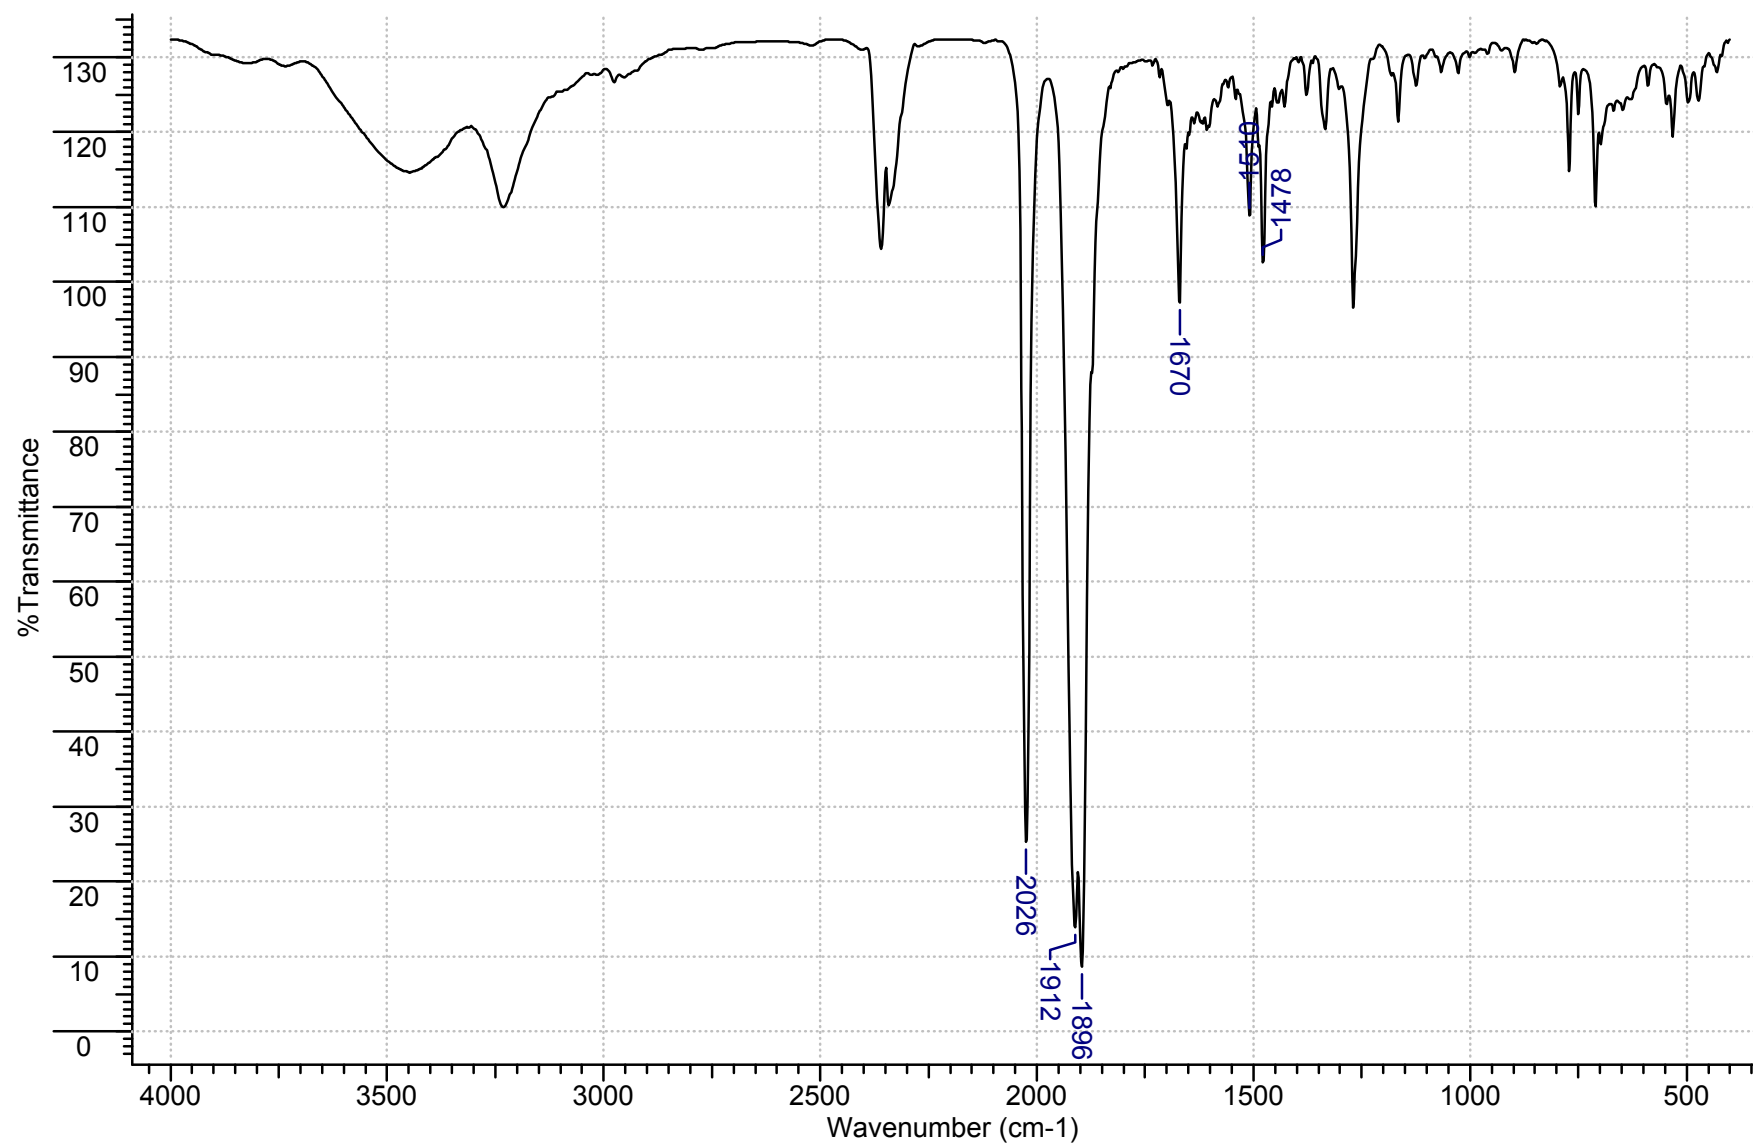

Fig. S2 IR spectrum of complex  $[\text{ReCl}(\text{CO}_3)(\text{H}_2\text{AcpClPh})] \cdot 0.5\text{C}_7\text{H}_8$  (2)

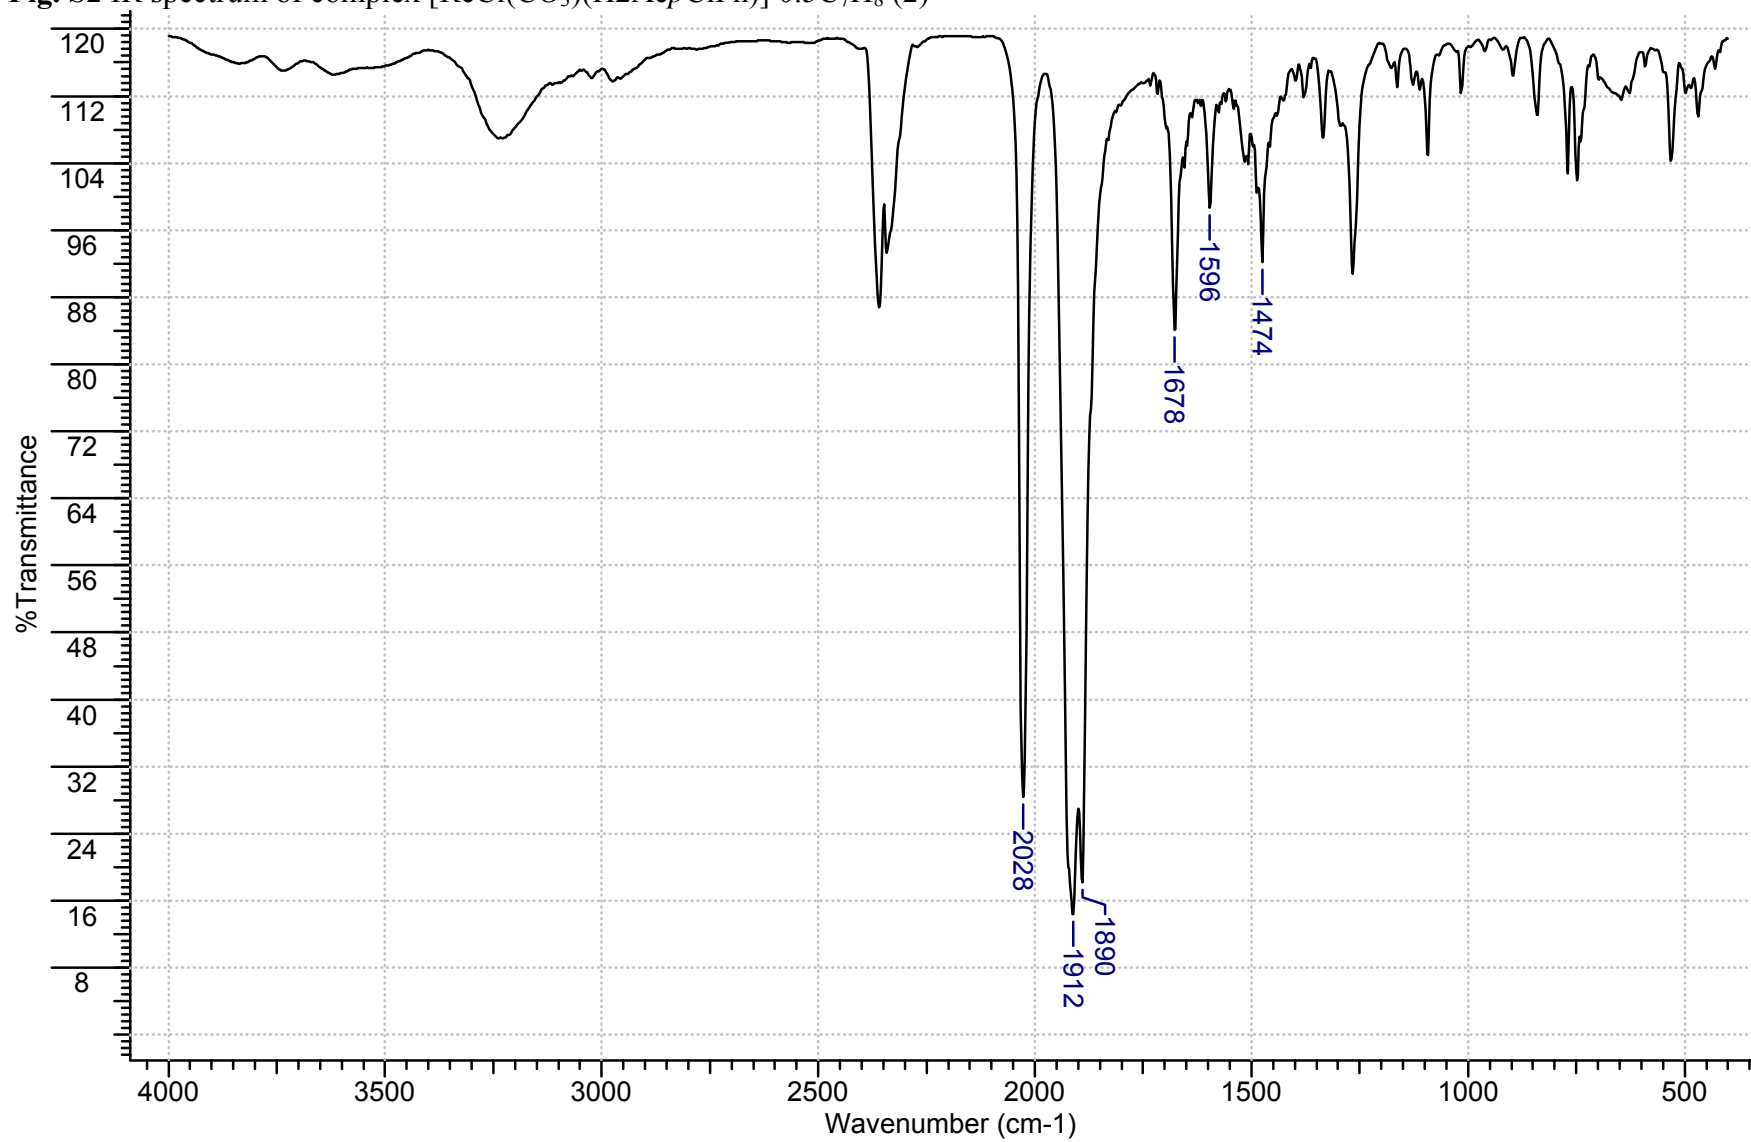

Fig. S3 IR spectrum of complex  $[\text{ReCl}(\text{CO})_3(\text{H}_2\text{Ac}p\text{NO}_2\text{Ph})] \cdot 0.5\text{C}_7\text{H}_8$  (**3**)

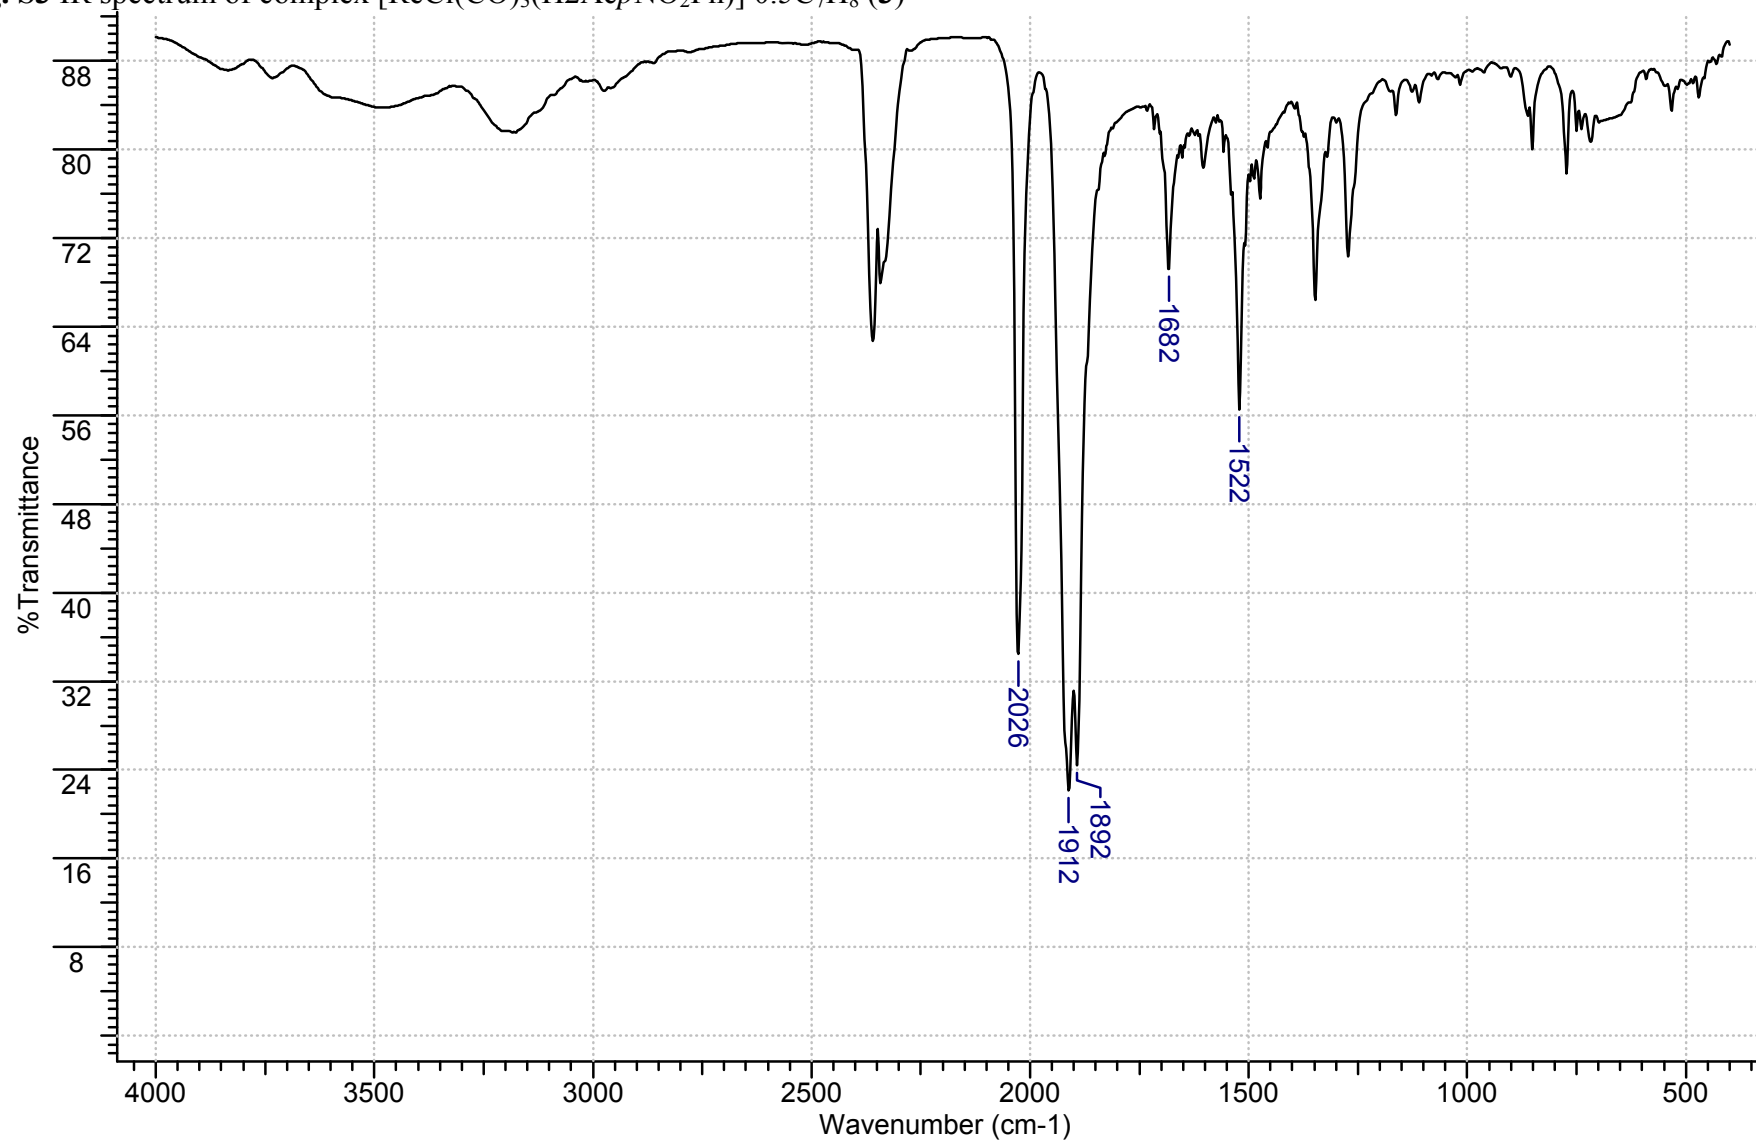

$^1\text{H}$  and  $^{13}\text{C}$  NMR spectra of complexes  $[\text{ReCl}(\text{CO})_3(\text{H}_2\text{AcPh})]$  (**1**),

$[\text{ReCl}(\text{CO})_3(\text{H}_2\text{Ac}p\text{ClPh})] \cdot 0.5\text{C}_7\text{H}_8$  (**2**) and

$[\text{ReCl}(\text{CO})_3(\text{H}_2\text{Ac}p\text{NO}_2\text{Ph})] \cdot 0.5\text{C}_7\text{H}_8$  (**3**)

Fig. S4  $^1\text{H}$  NMR spectrum of complex  $[\text{ReCl}(\text{CO})_3(\text{H}_2\text{AcPh})]$  (**1**) in  $\text{DMSO-}d_6$  (200 MHz) at room temperature

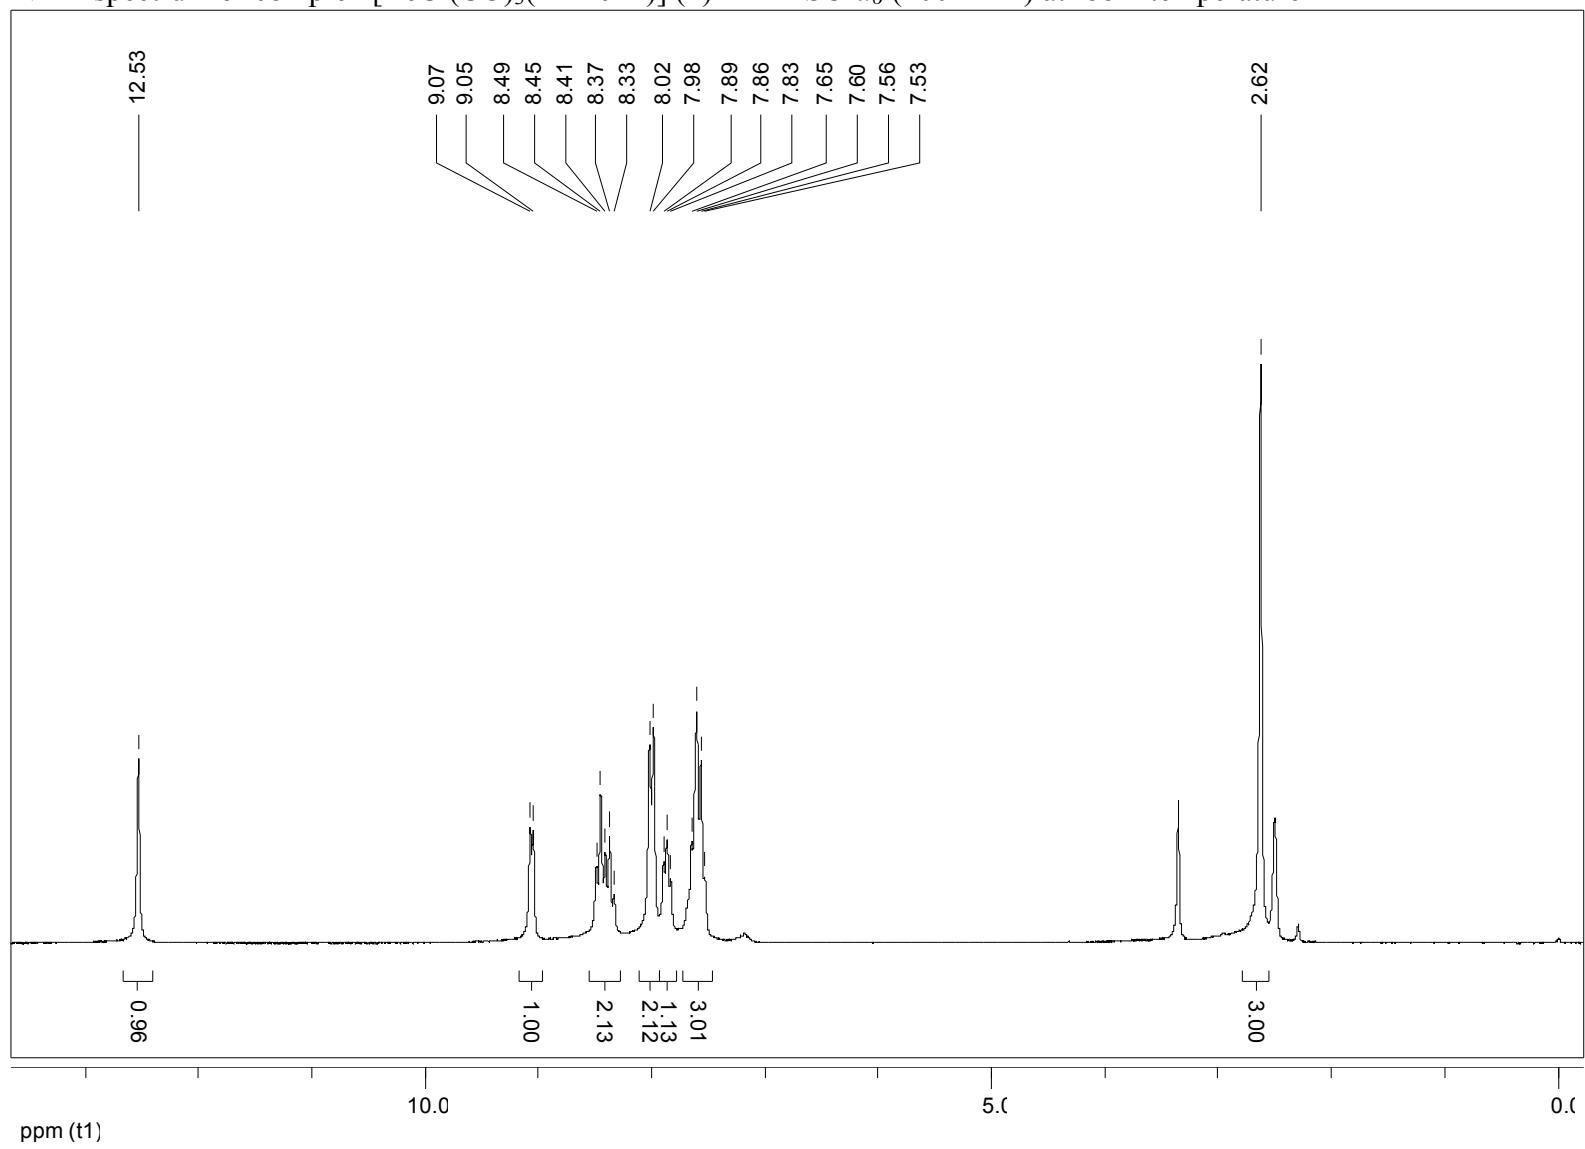



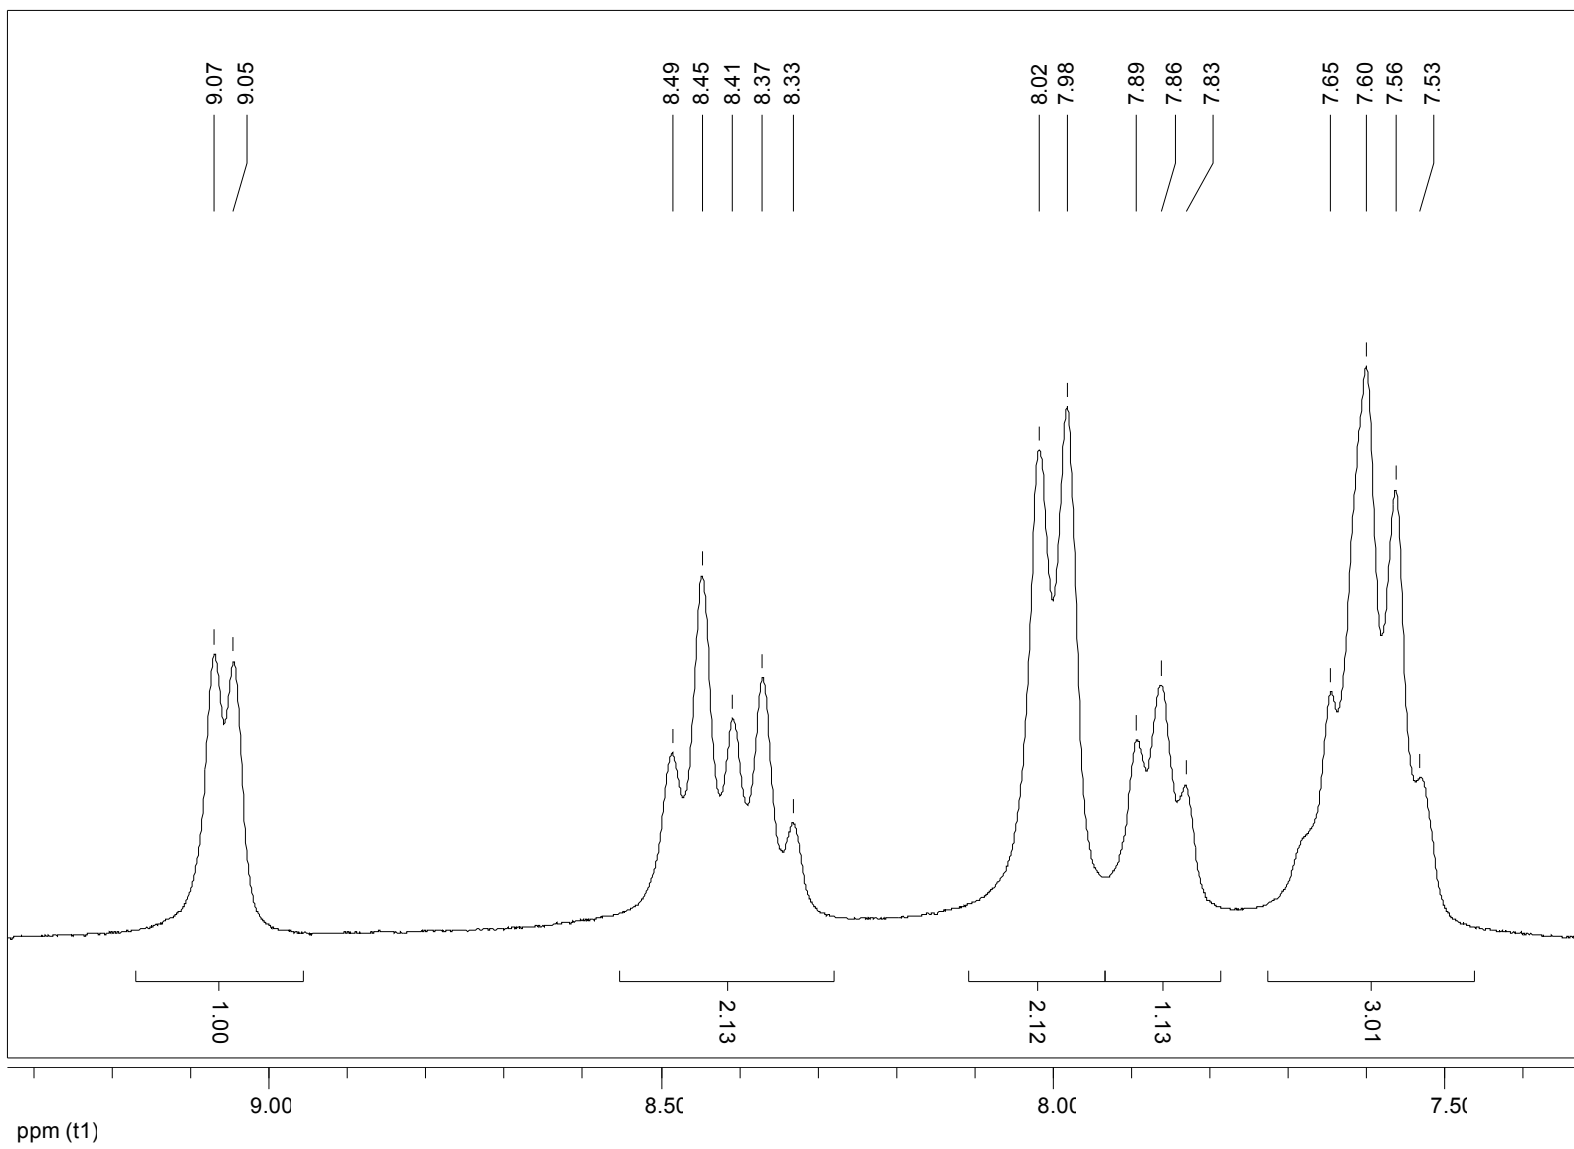

**Fig. S5**  $^{13}\text{C}$  NMR spectrum of complex  $[\text{ReCl}(\text{CO})_3(\text{H}_2\text{AcPh})]$  (**1**) in  $\text{DMSO-}d_6$  (50 MHz) at room temperature

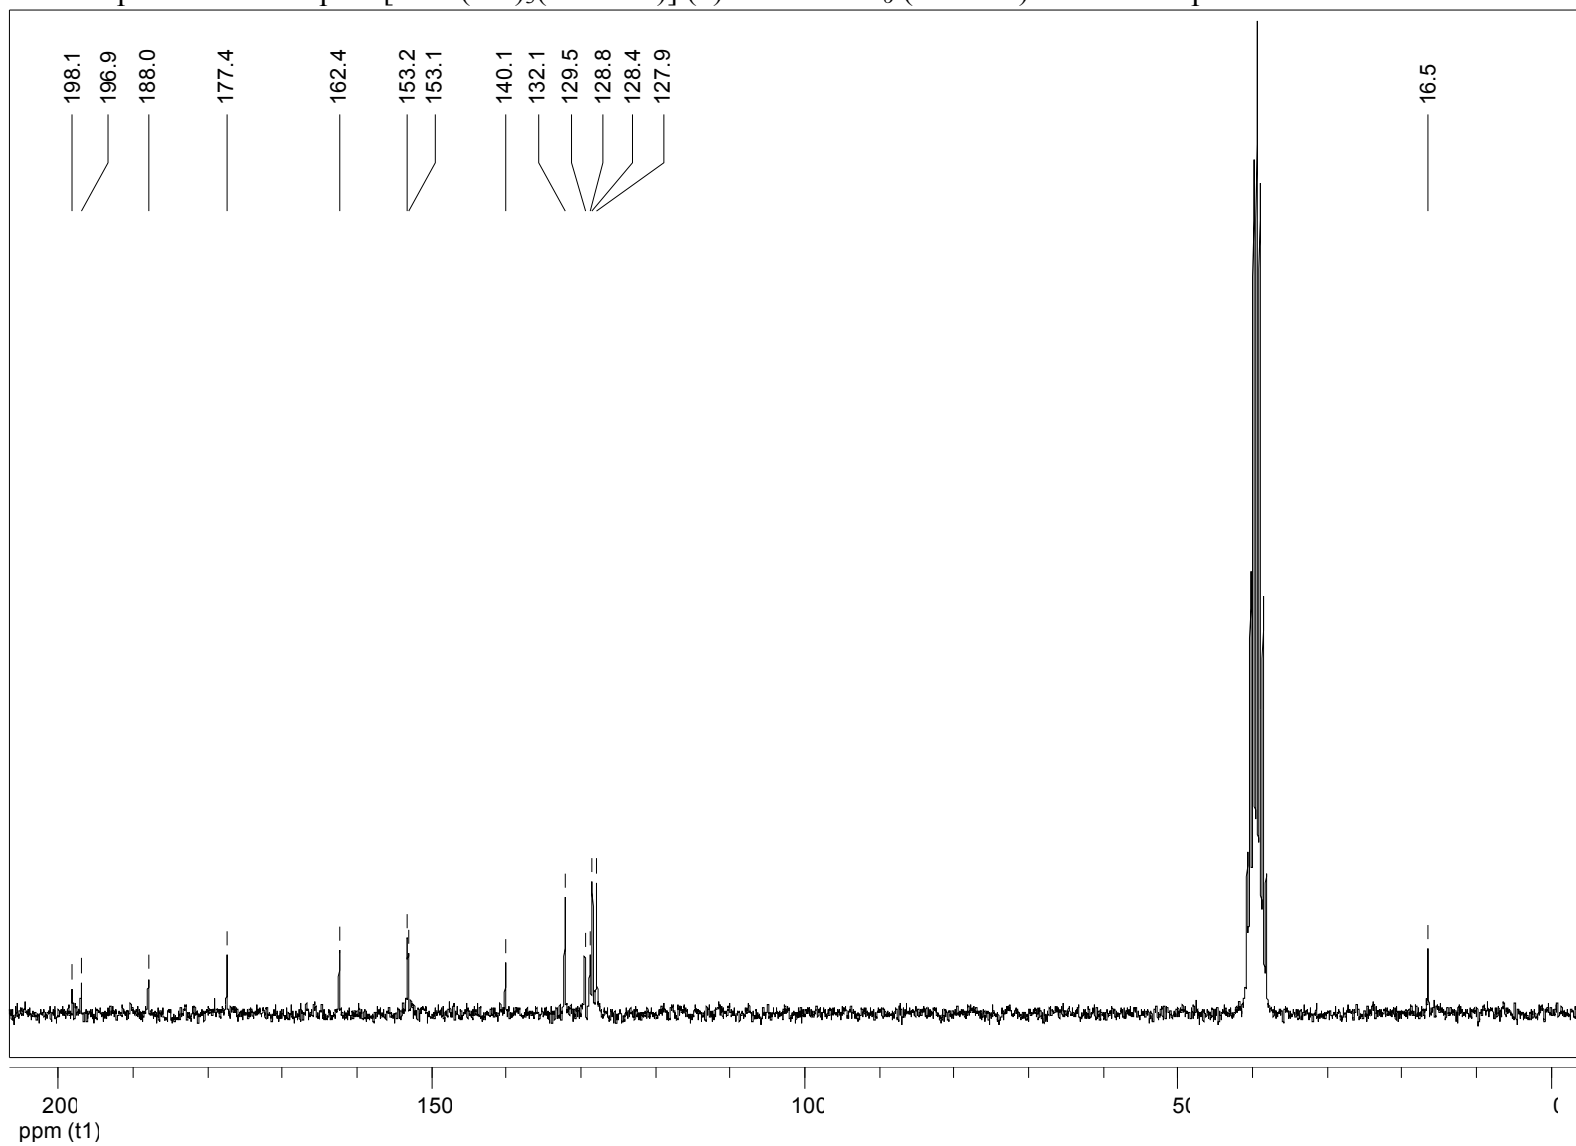

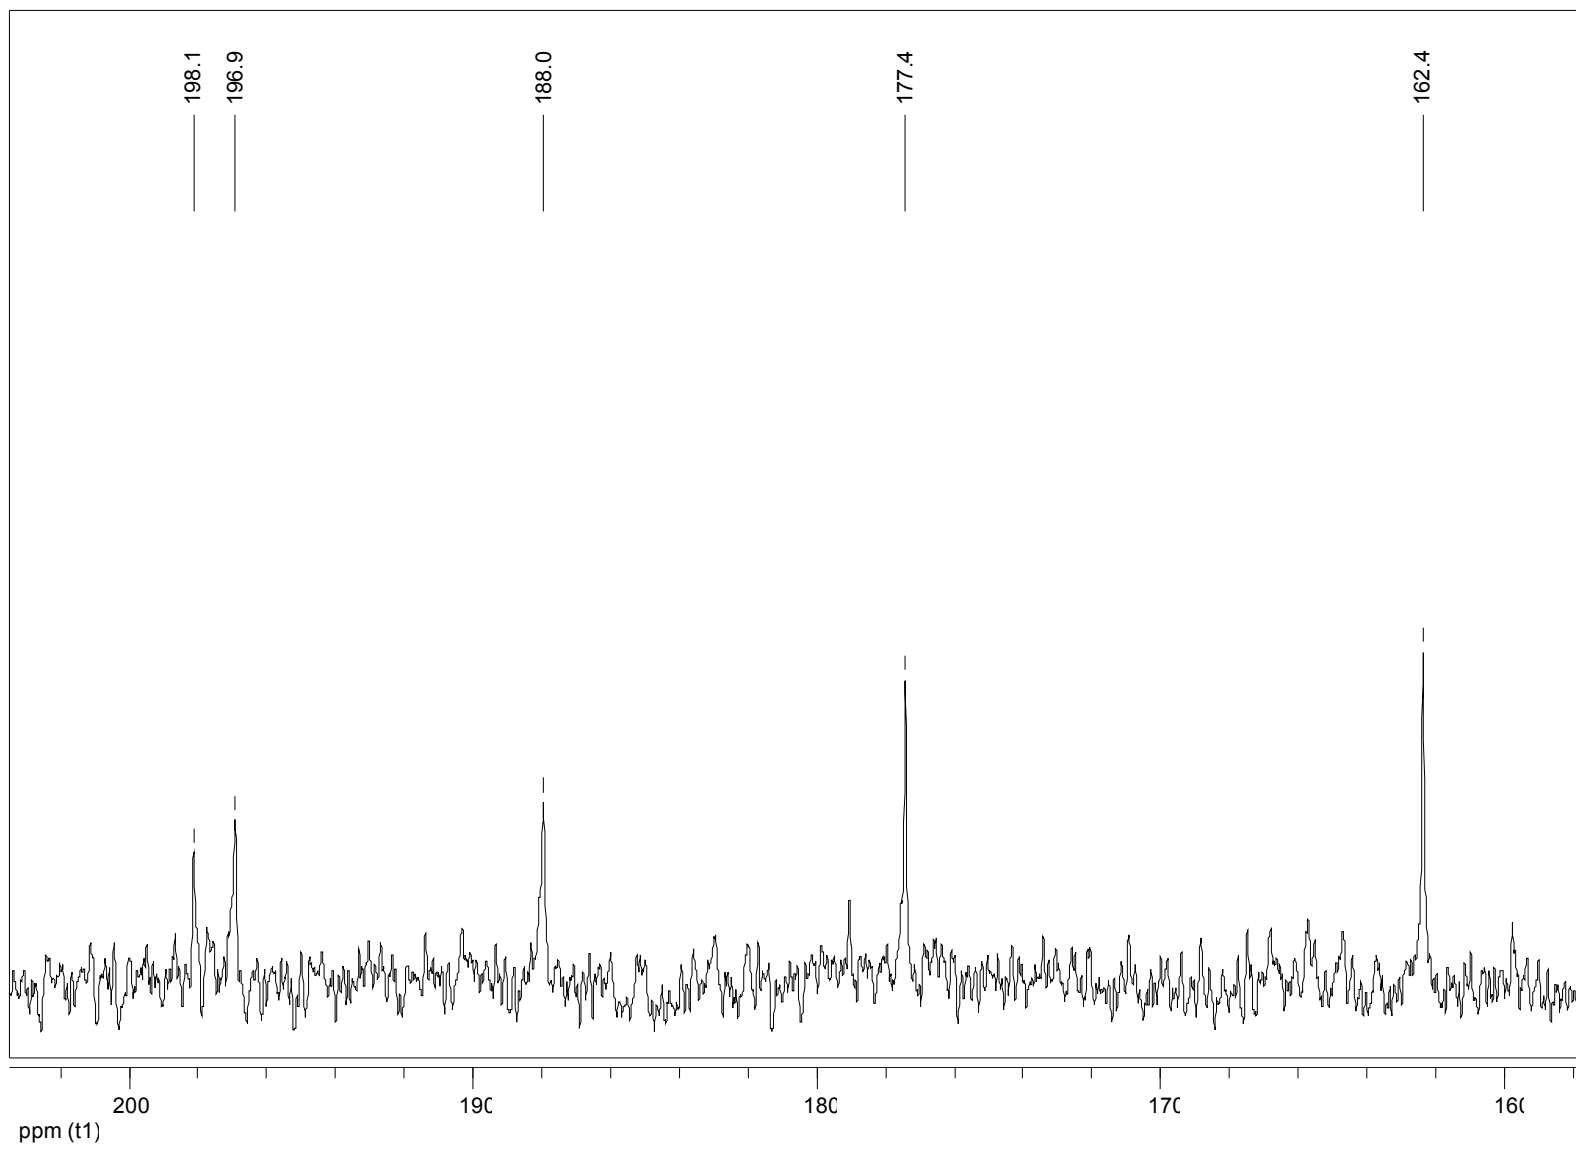

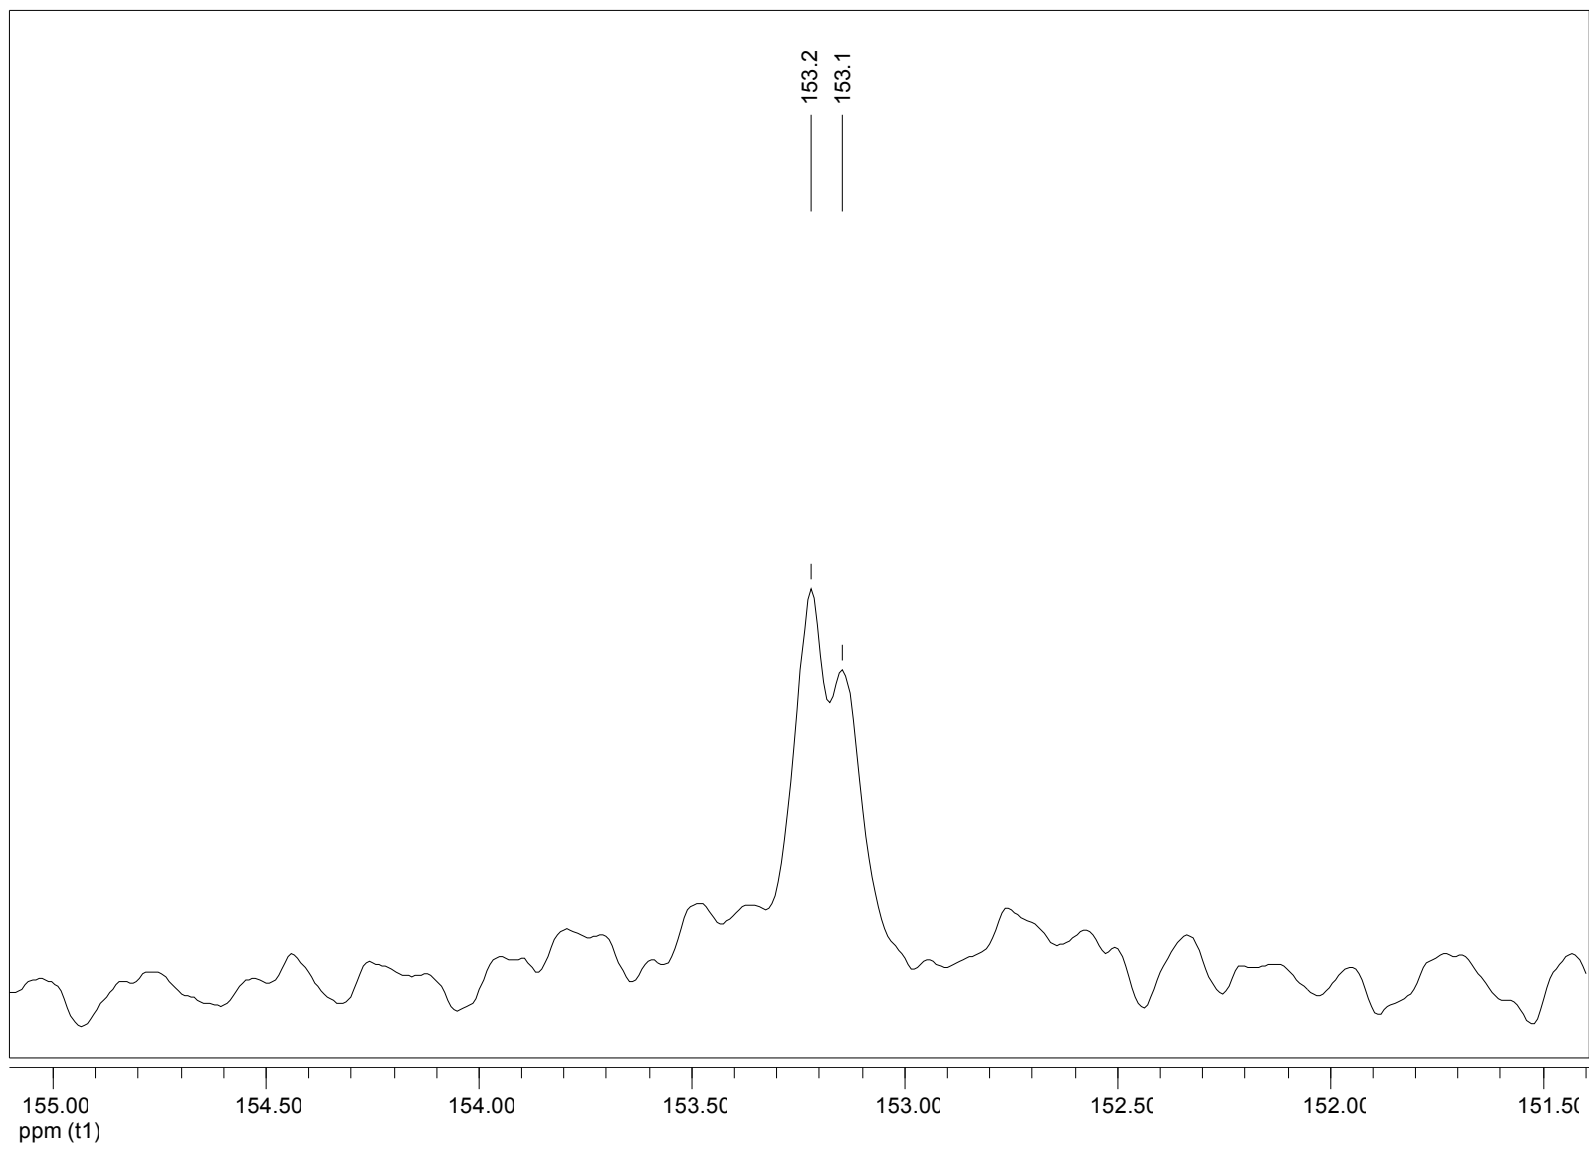

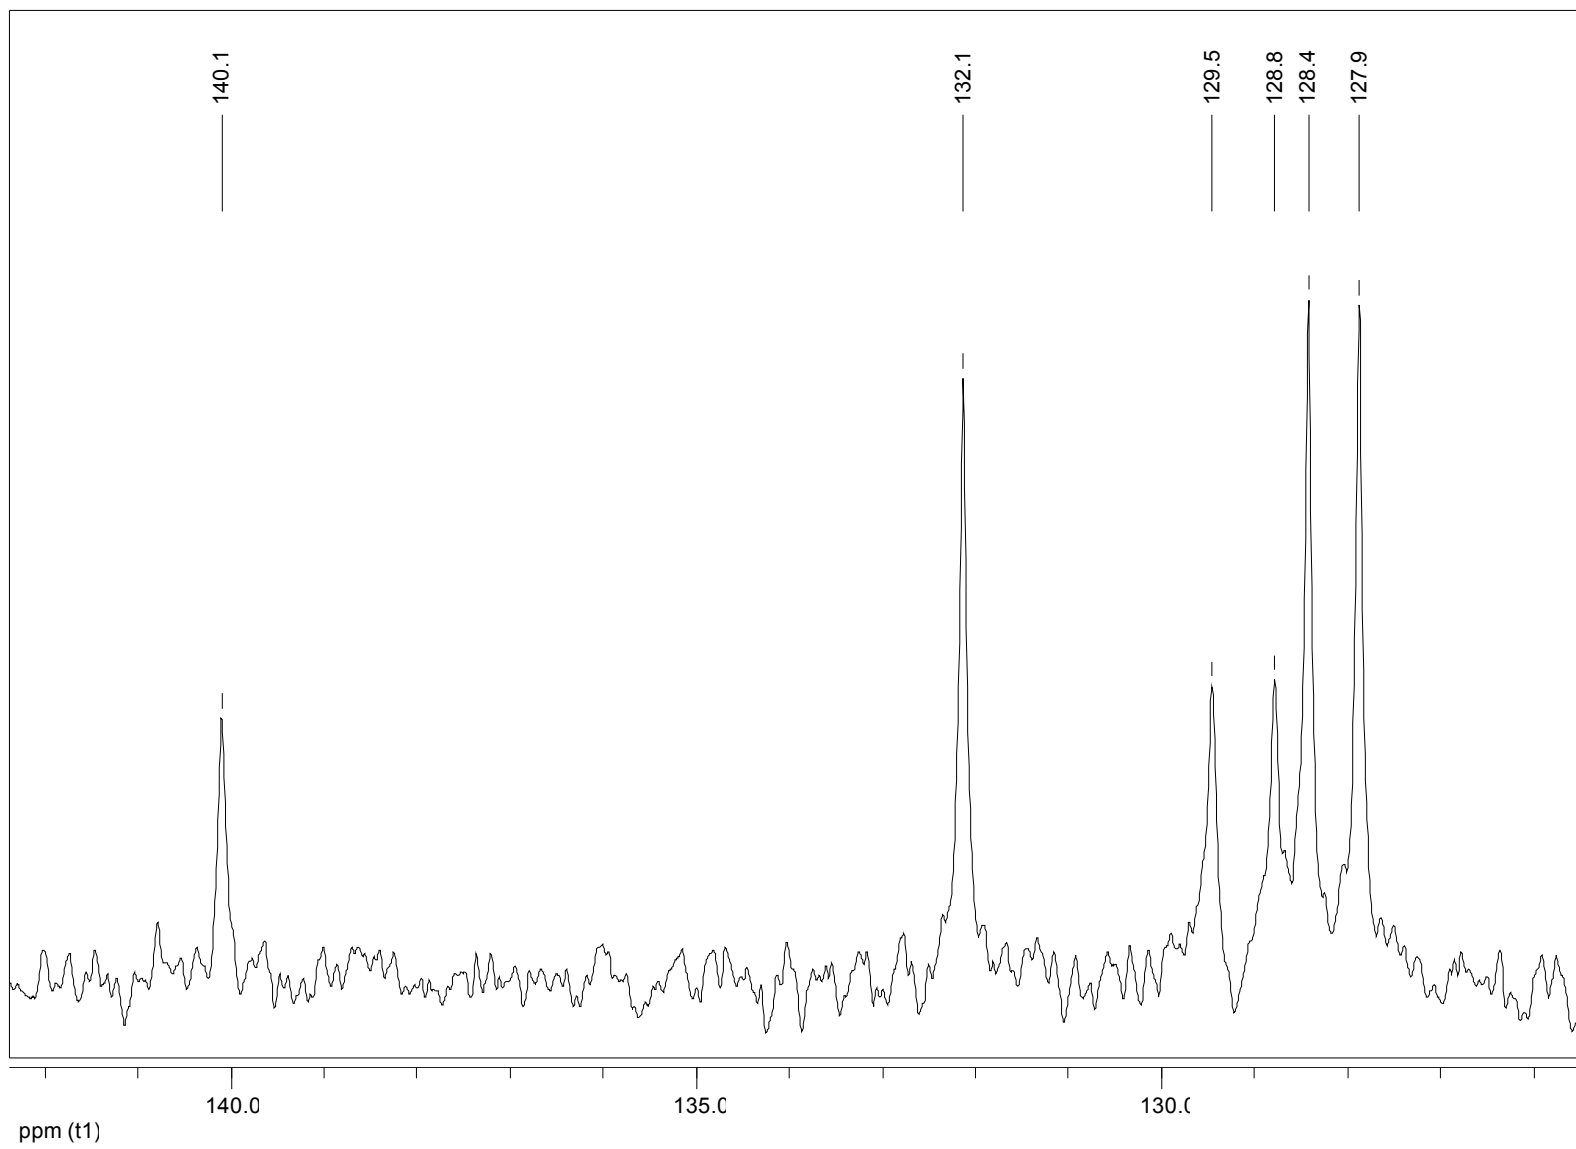

Fig. S6  $^1\text{H}$  NMR spectrum of complex  $[\text{ReCl}(\text{CO}_3)(\text{H}_2\text{AcpClPh})] \cdot 0.5\text{C}_7\text{H}_8$  (**2**) in  $\text{DMSO-}d_6$  (200 MHz) at room temperature

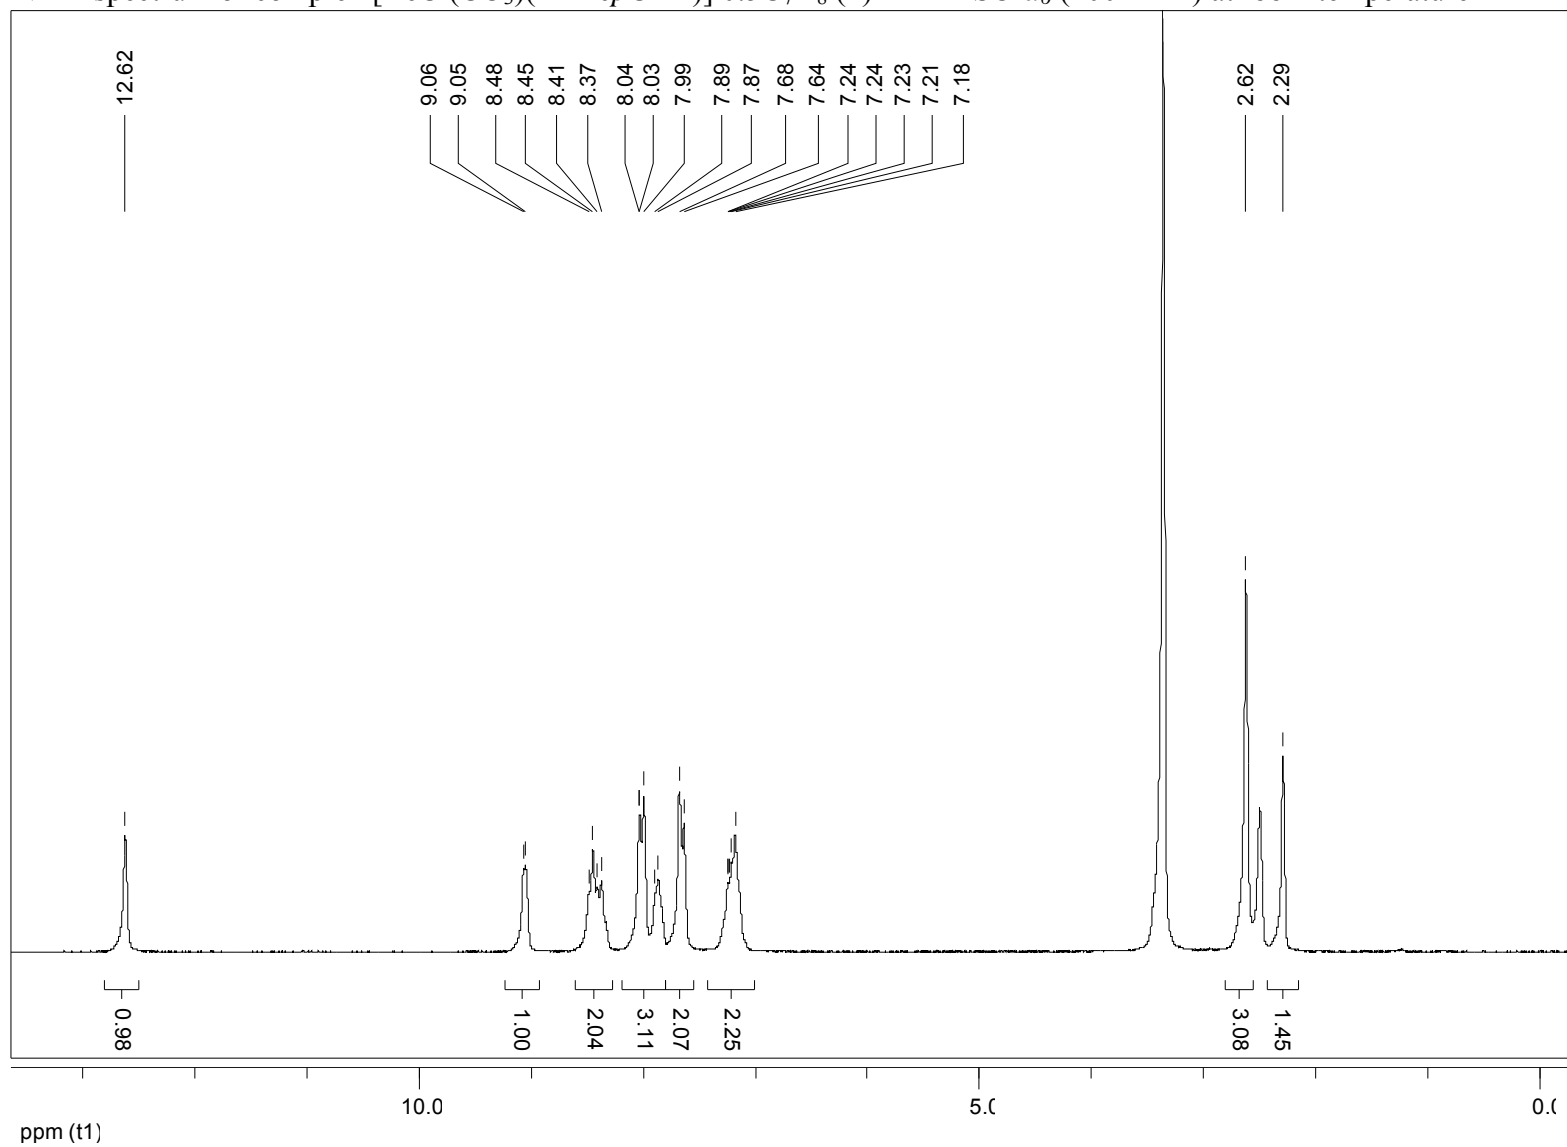

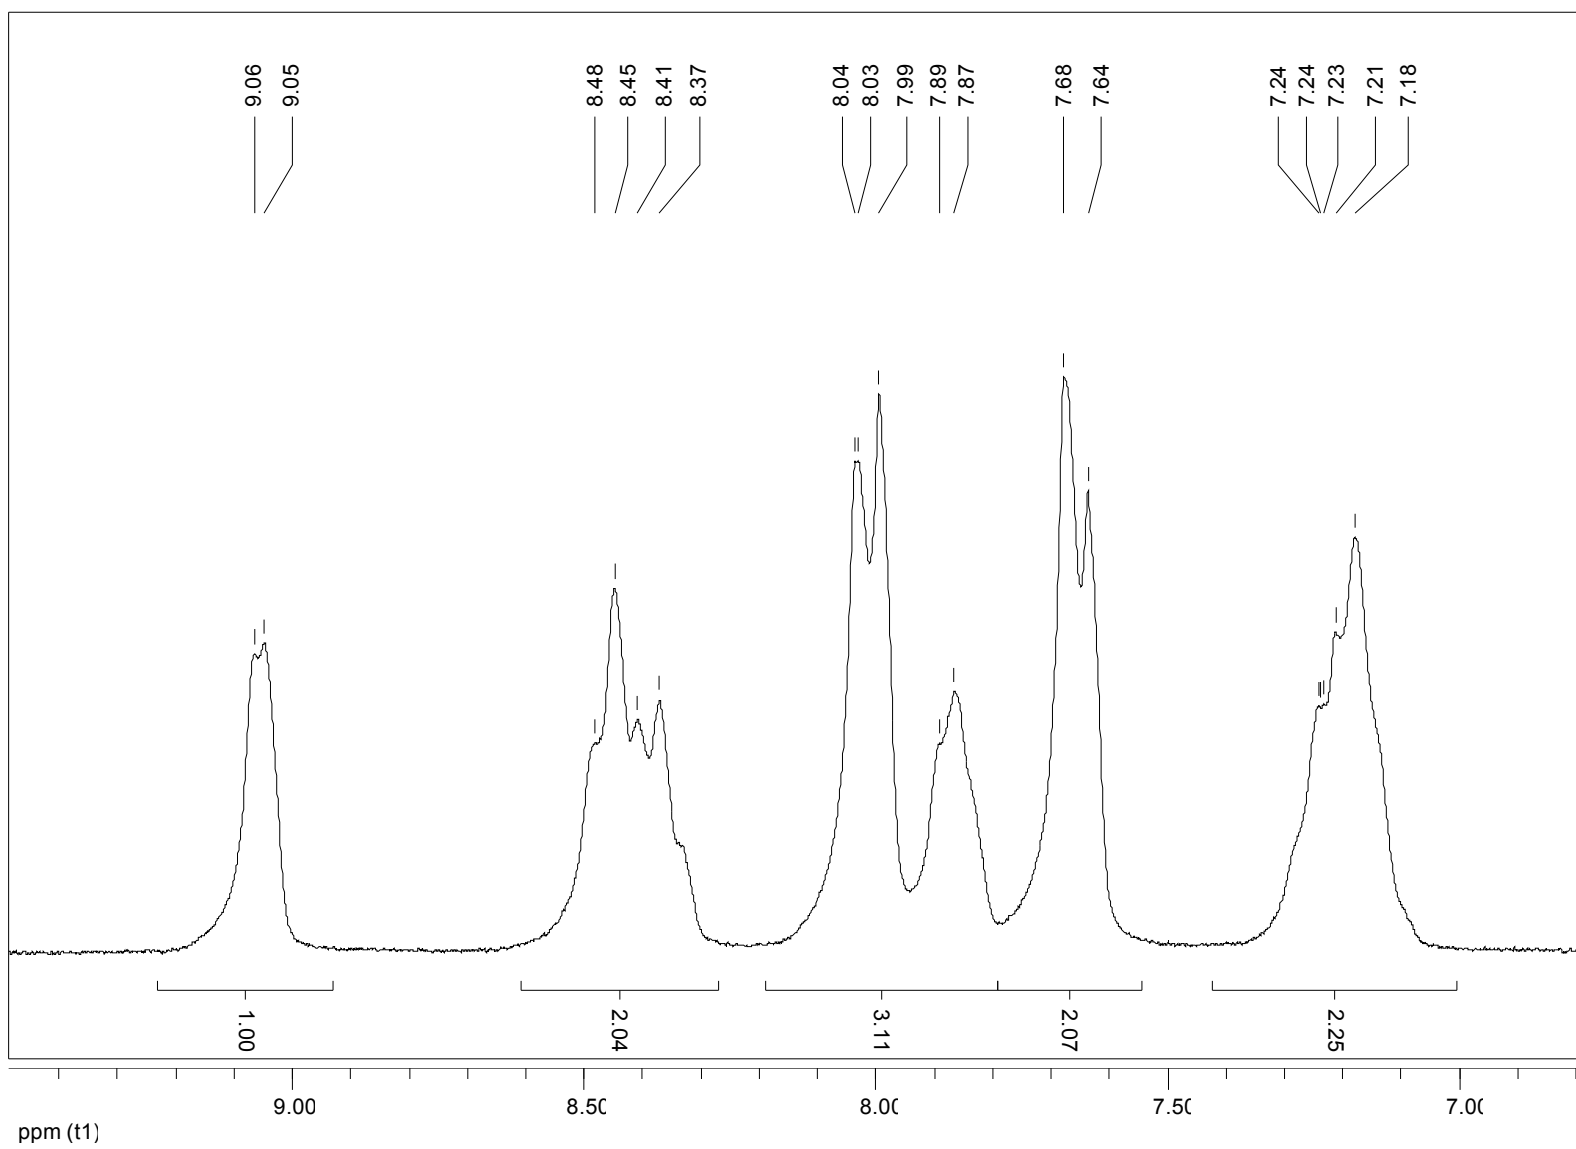

Fig. S7  $^{13}\text{C}$  NMR spectrum of complex  $[\text{ReCl}(\text{CO}_3)(\text{H}_2\text{Ac}_p\text{ClPh})]\cdot 0.5\text{C}_7\text{H}_8$  (**2**) in  $\text{DMSO-}d_6$  (50 MHz) at room temperature

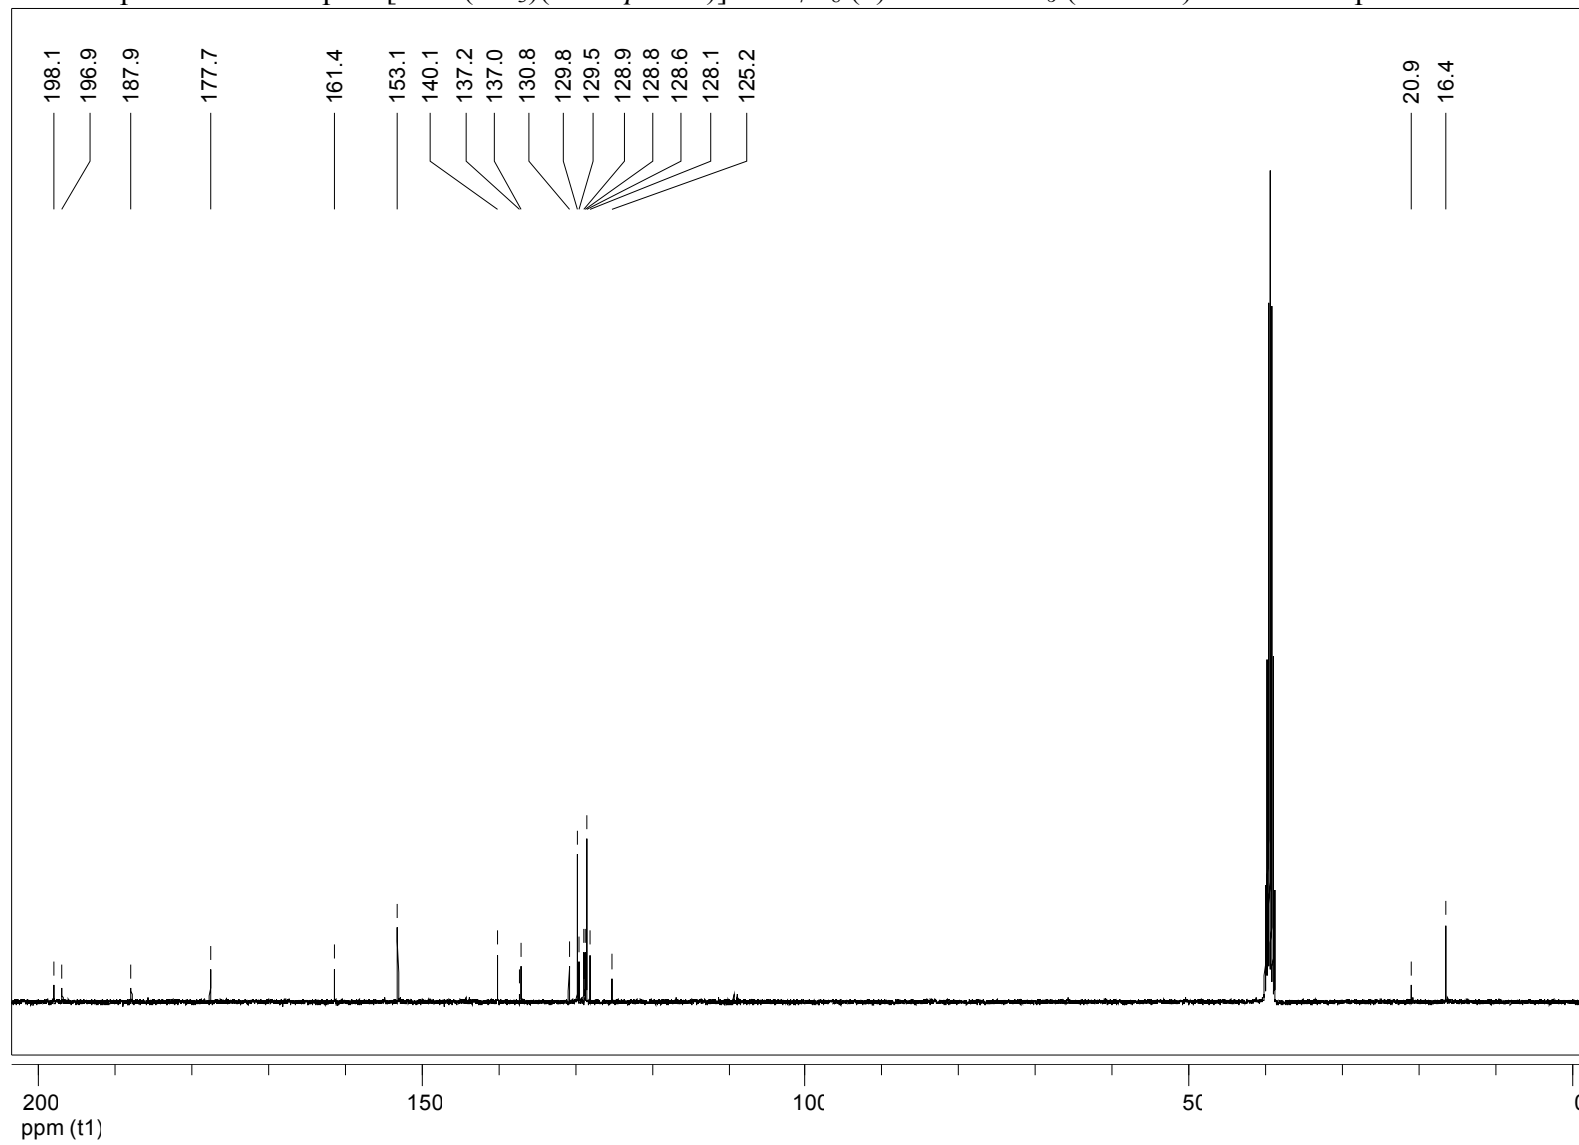



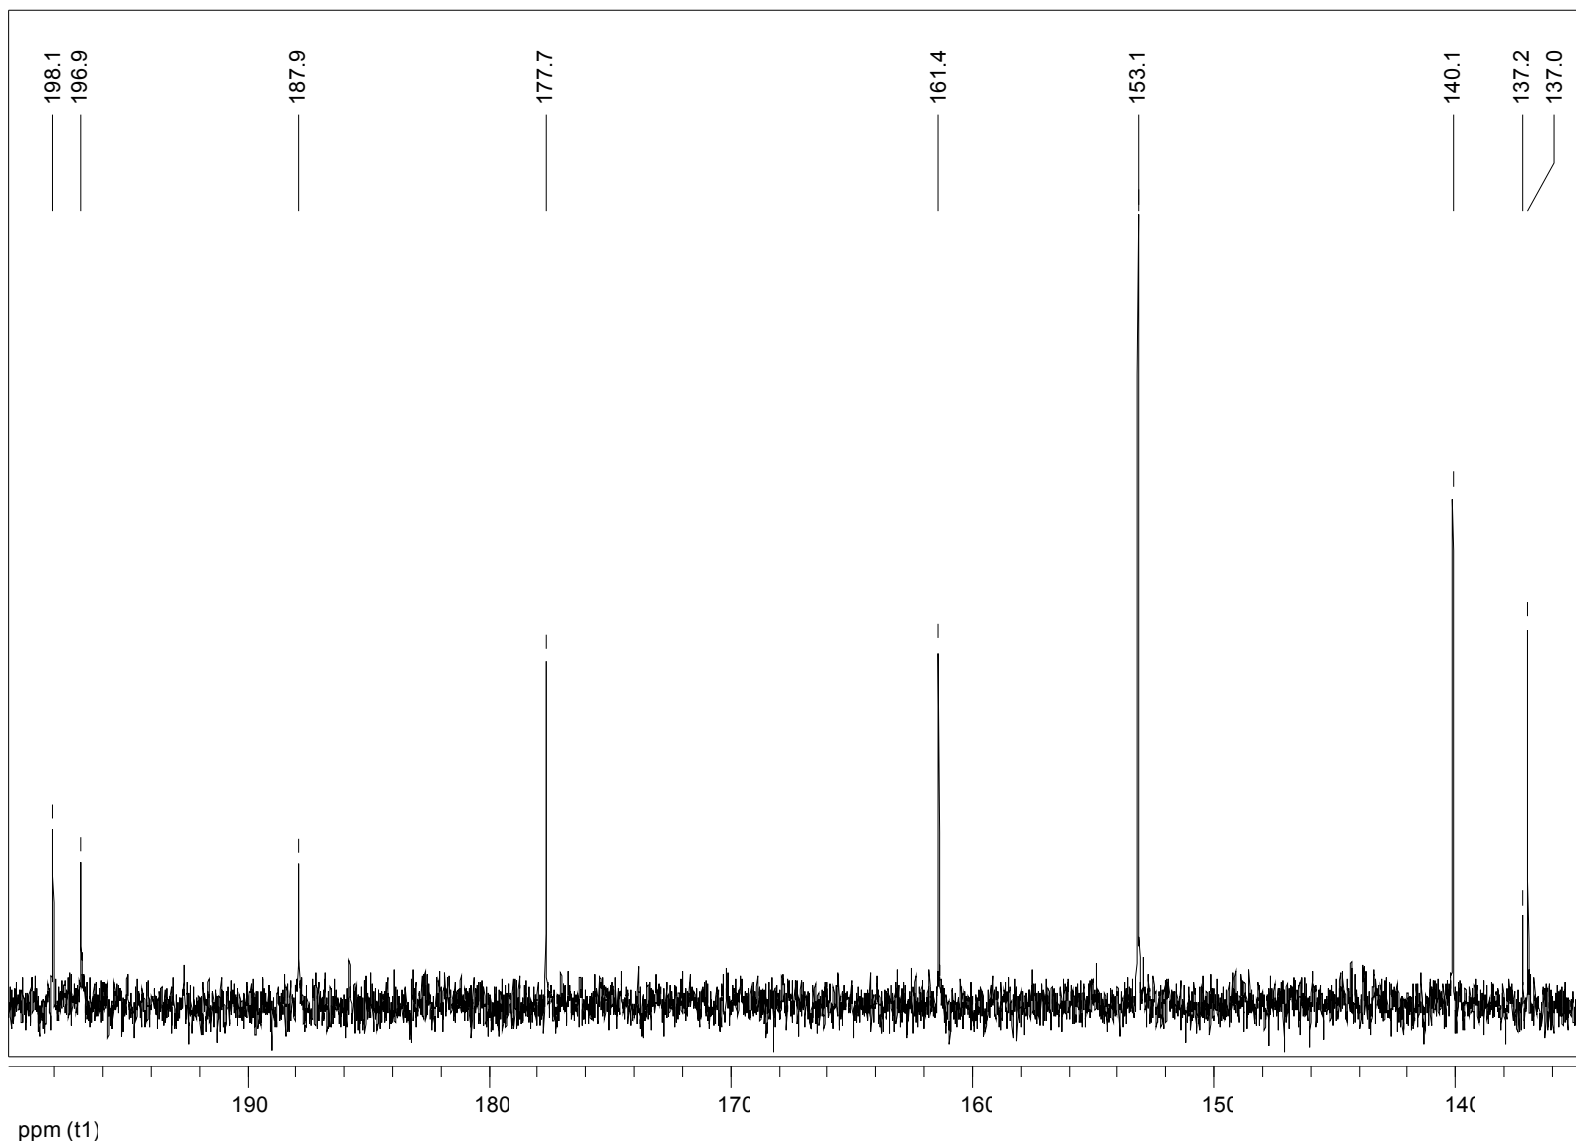

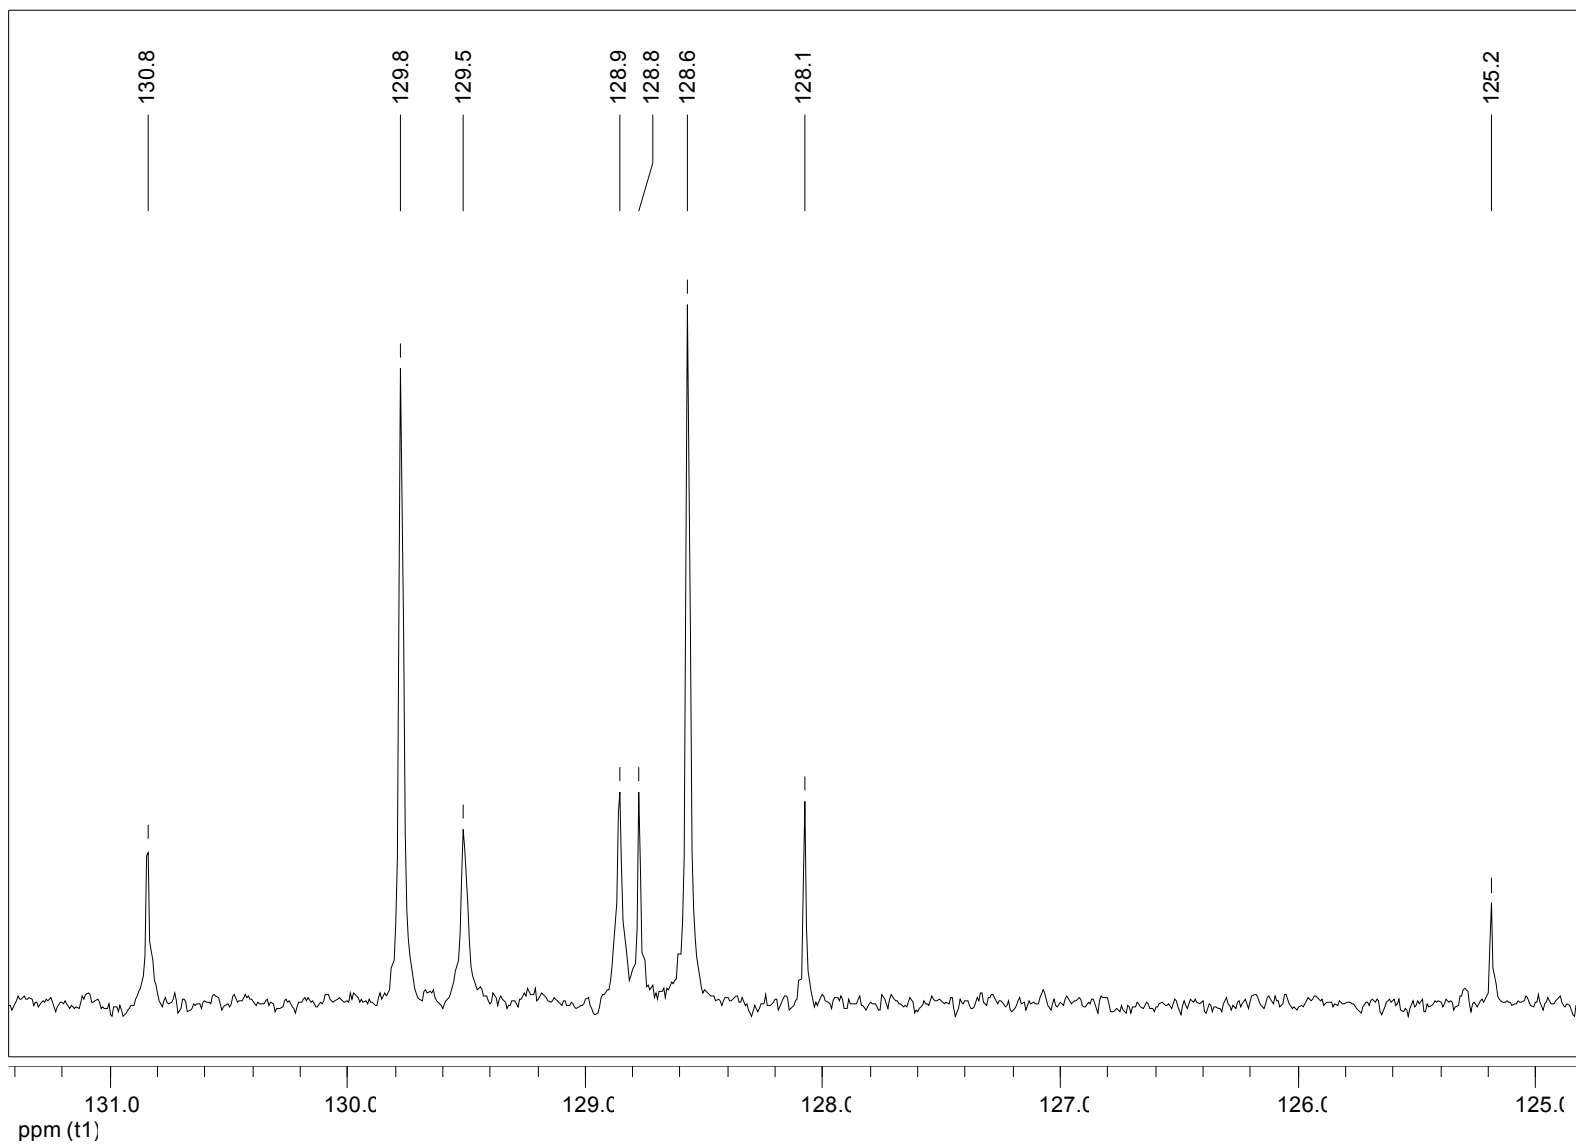

**Fig. S8**  $^1\text{H}$  NMR spectrum of complex  $[\text{ReCl}(\text{CO})_3(\text{H}_2\text{Ac}p\text{NO}_2\text{Ph})]\cdot 0.5\text{C}_7\text{H}_8$  (**3**) in  $\text{DMSO-}d_6$  (200 MHz) at room temperature

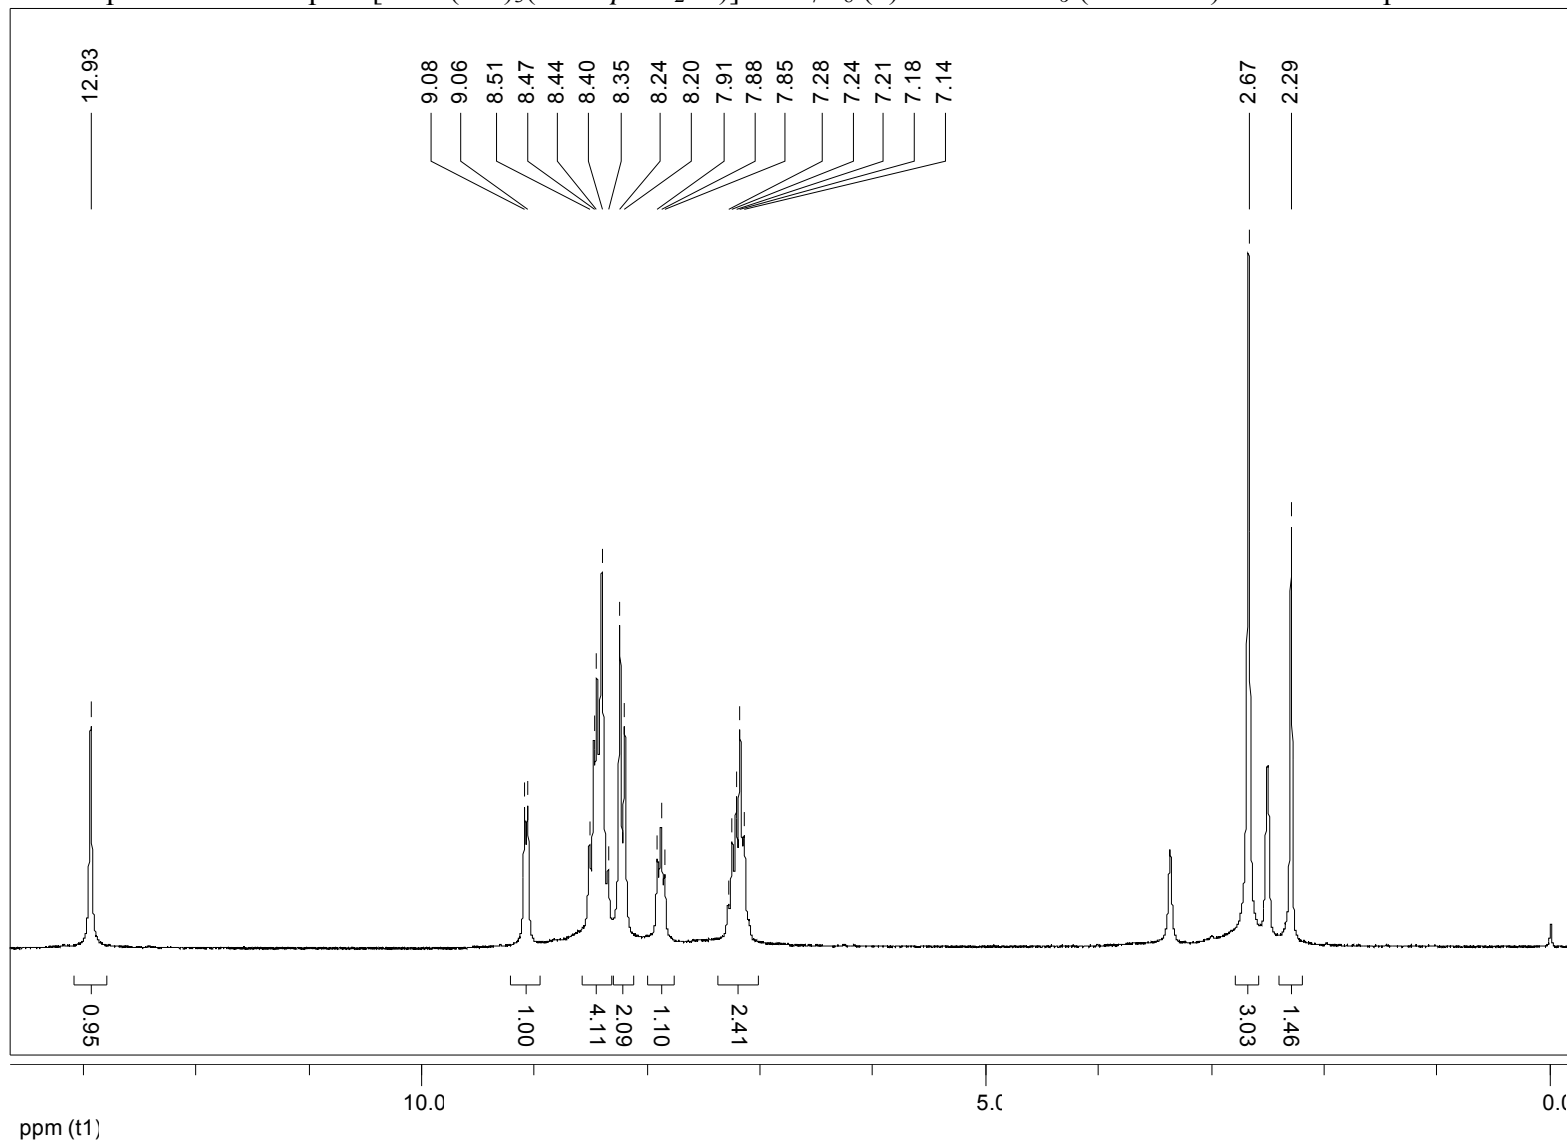

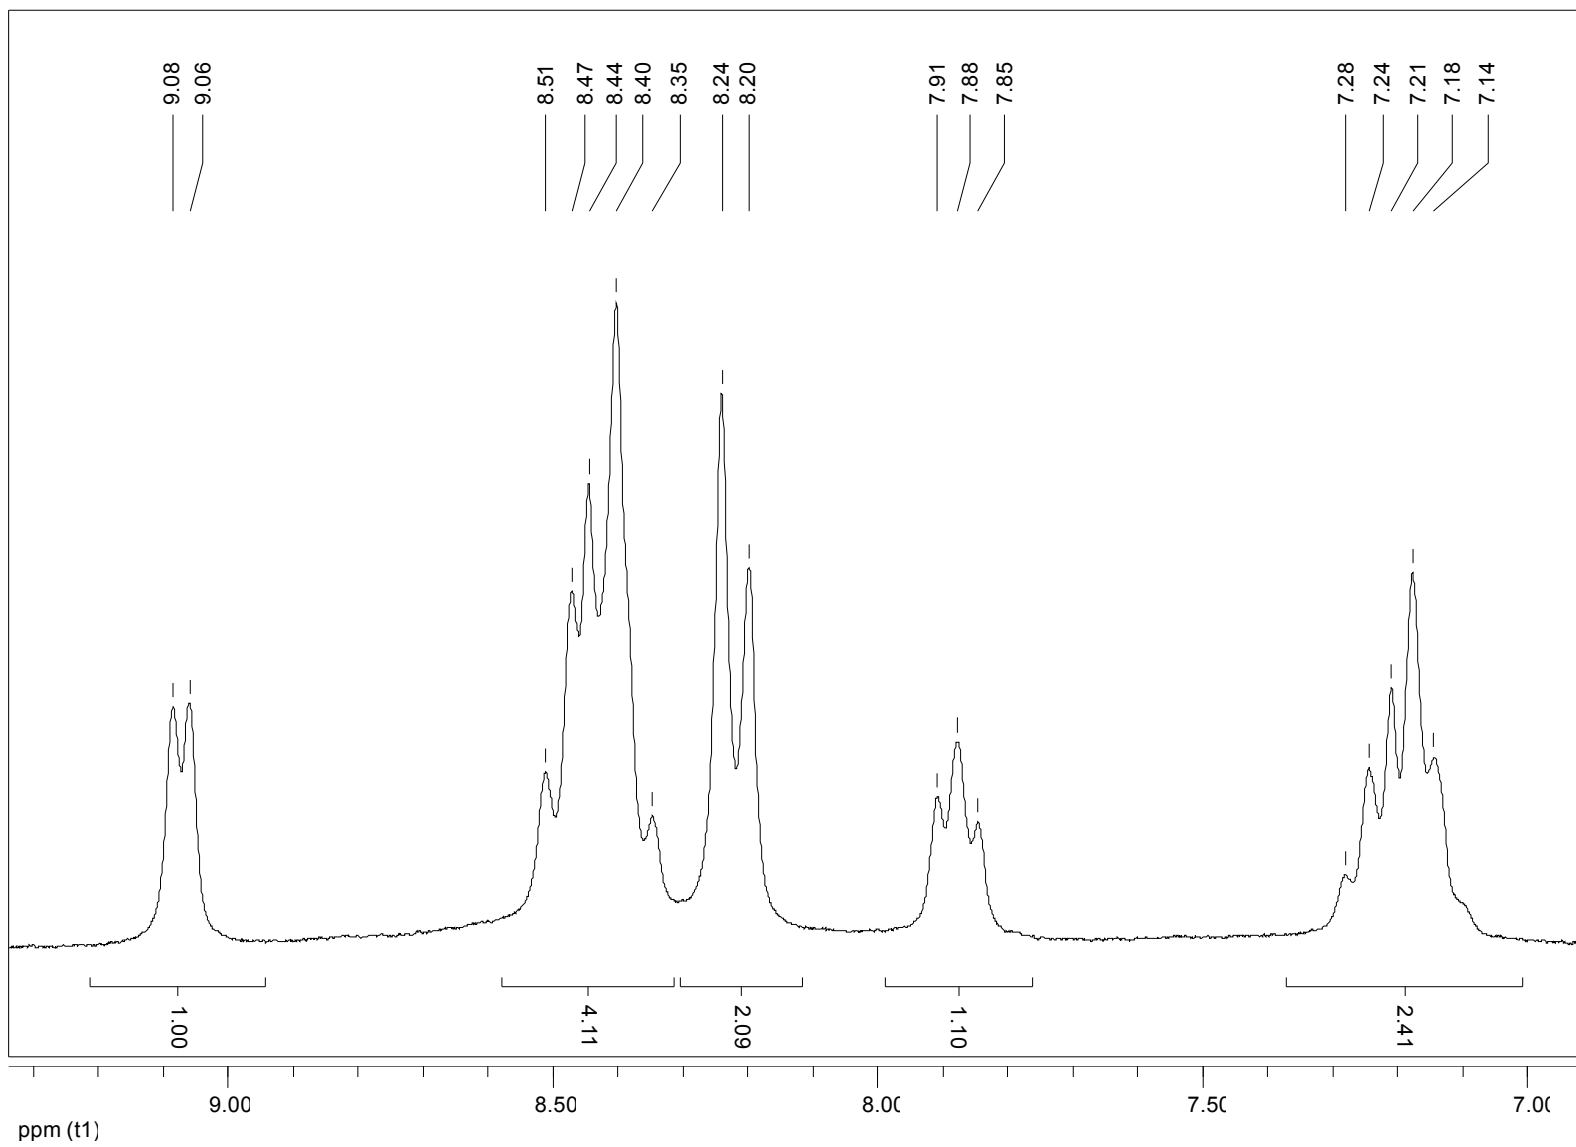

**Fig. S9**  $^{13}\text{C}$  NMR spectrum of complex  $[\text{ReCl}(\text{CO})_3(\text{H}_2\text{Ac}_p\text{NO}_2\text{Ph})]\cdot 0.5\text{C}_7\text{H}_8$  (**3**) in  $\text{DMSO-}d_6$  (50 MHz) at room temperature

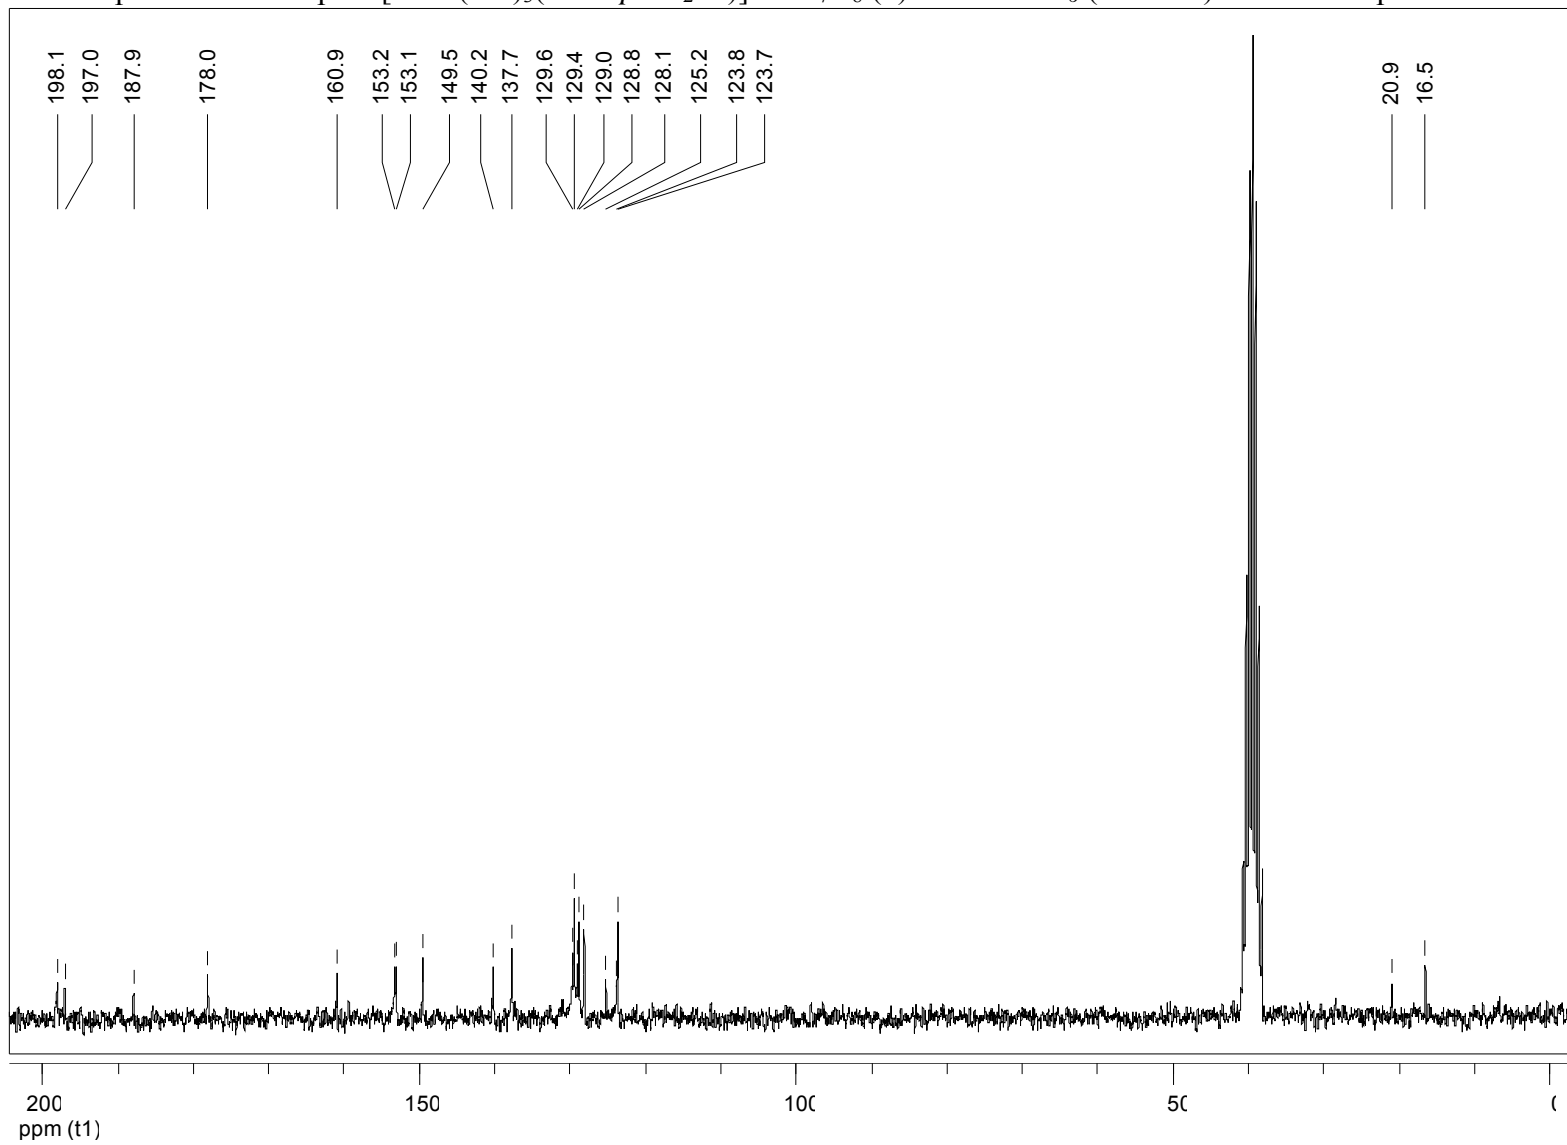

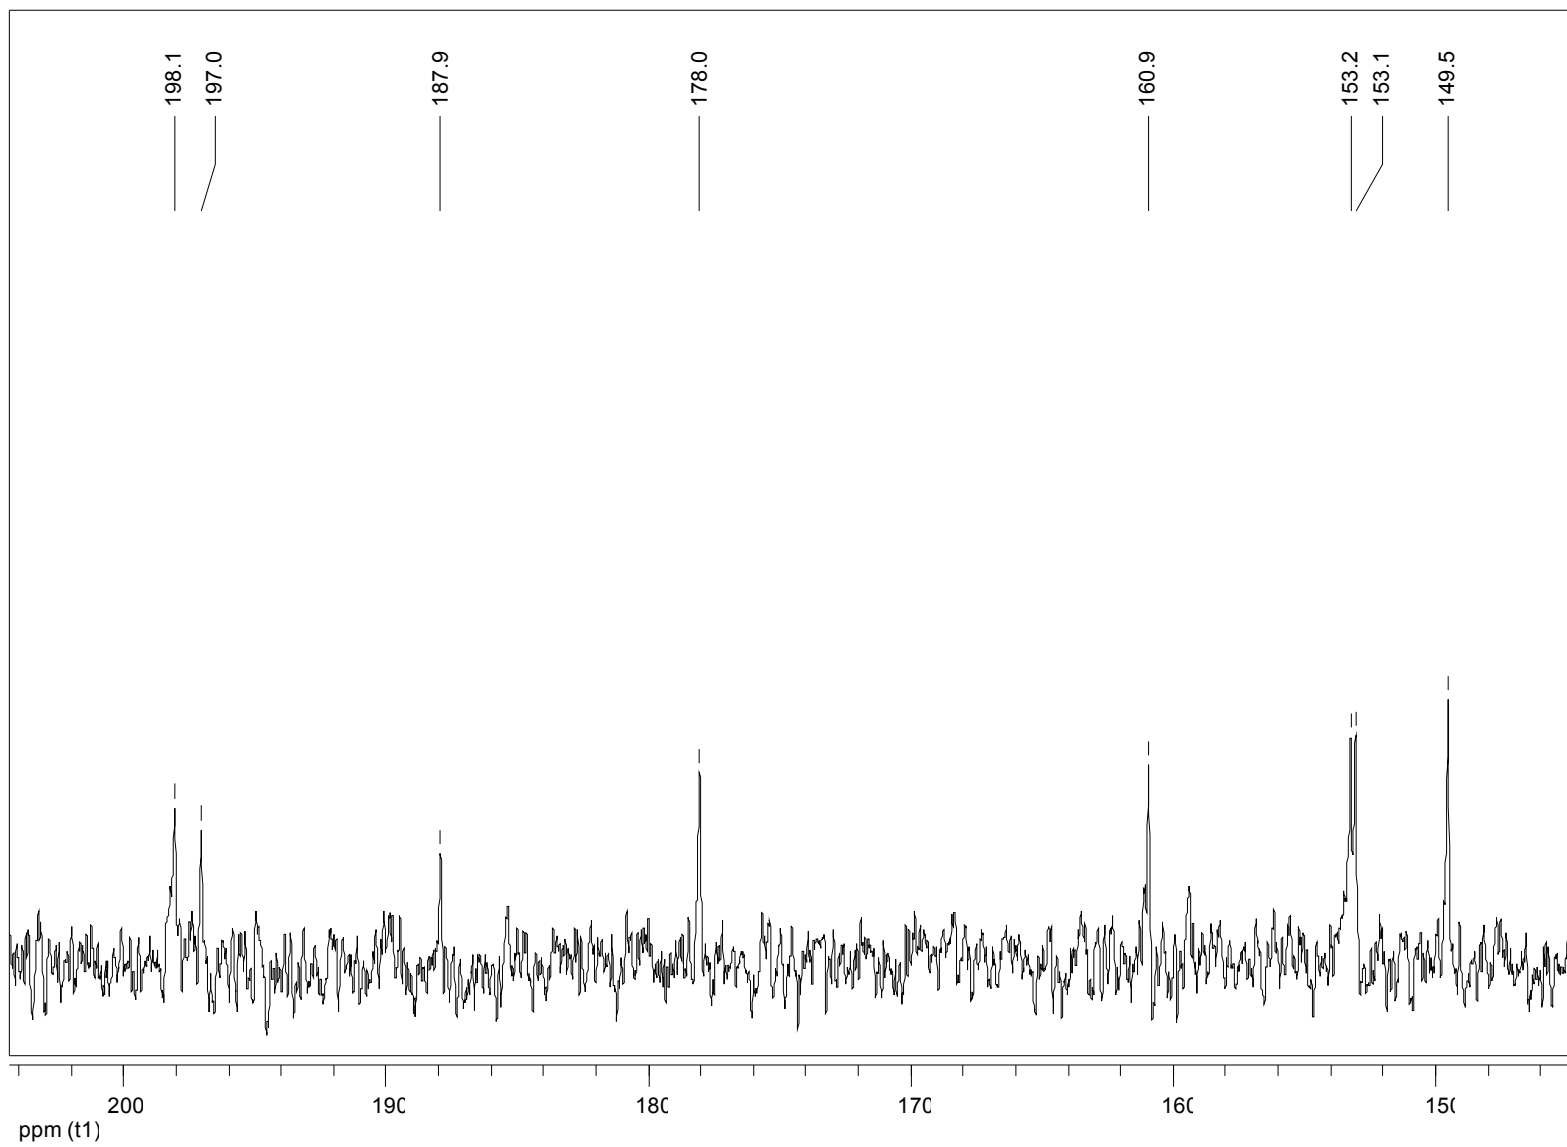

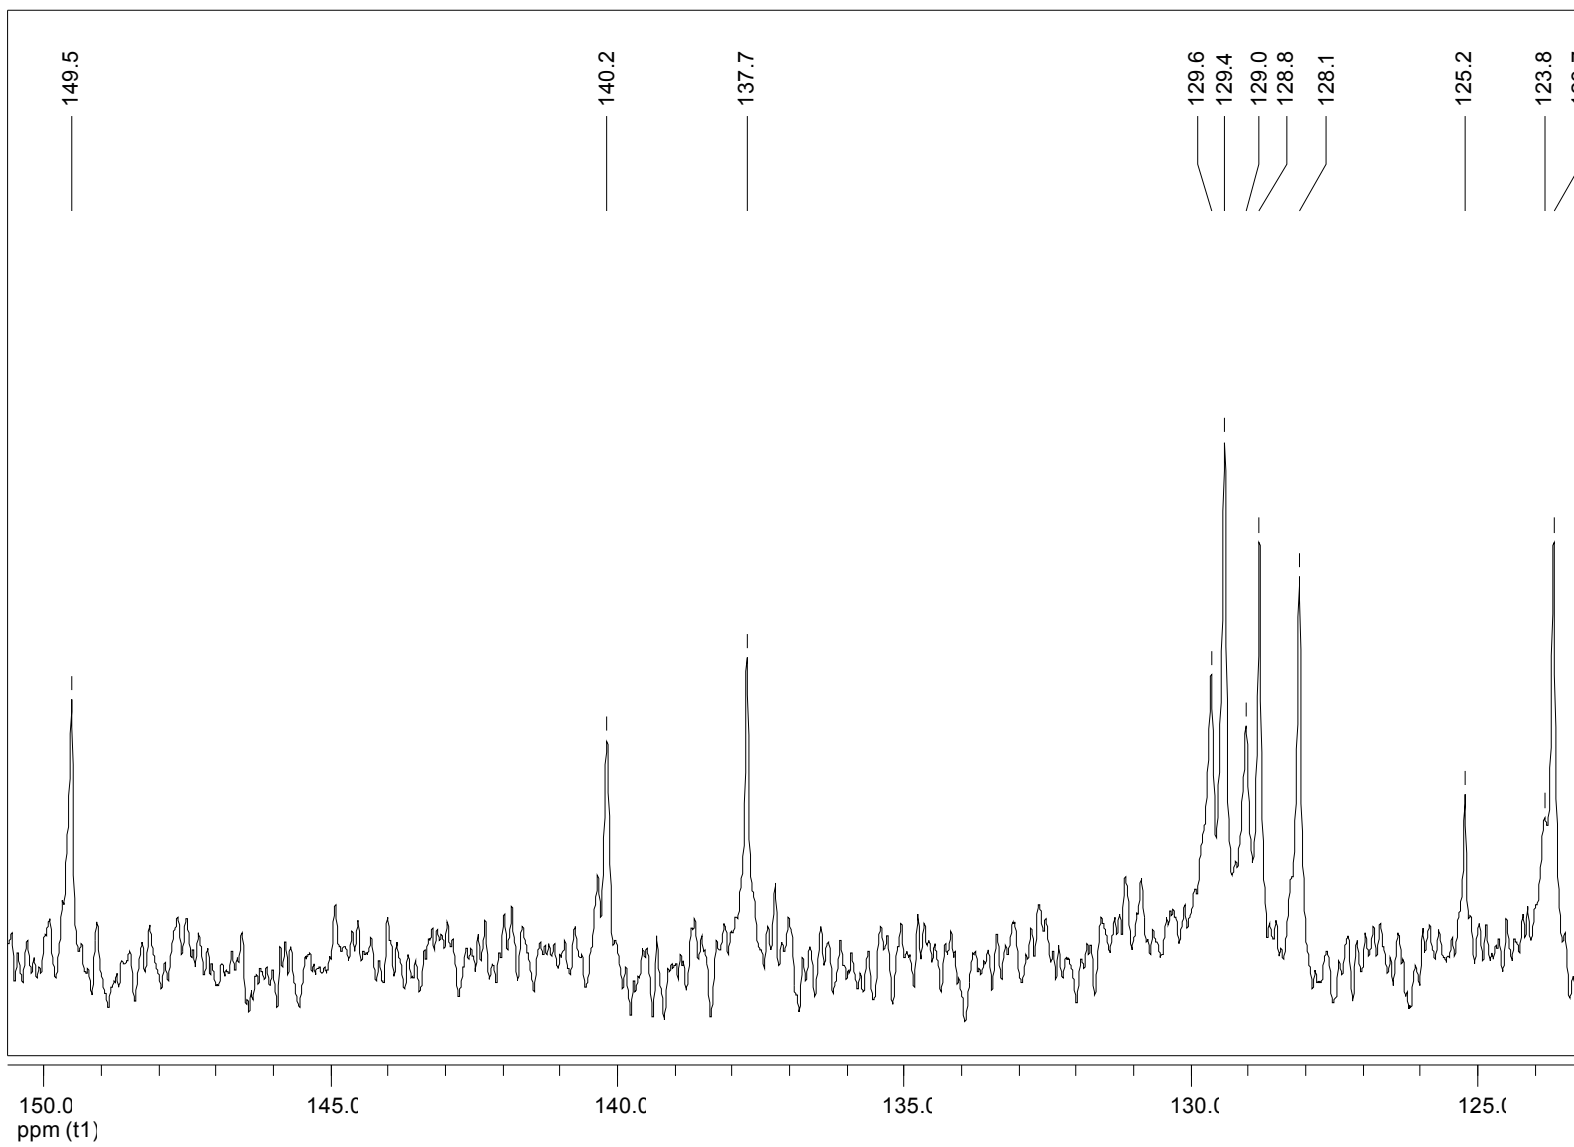

CHECKCIFs files of complexes  $[\text{ReCl}(\text{CO})_3(\text{H}_2\text{AcPh})]$  (**1**),

$[\text{ReCl}(\text{CO})_3(\text{H}_2\text{Ac}p\text{ClPh})]\cdot\text{DMSO}$  (**2a**) and

$[\text{ReCl}(\text{CO})_3(\text{H}_2\text{Ac}p\text{NO}_2\text{Ph})]\cdot\text{DMSO}$  (**3a**)



# checkCIF/PLATON report

You have not supplied any structure factors. As a result the full set of tests cannot be run.

THIS REPORT IS FOR GUIDANCE ONLY. IF USED AS PART OF A REVIEW PROCEDURE FOR PUBLICATION, IT SHOULD NOT REPLACE THE EXPERTISE OF AN EXPERIENCED CRYSTALLOGRAPHIC REFEREE.

No syntax errors found.      CIF dictionary      Interpreting this report

## Datablock: RePh Complex (1)

---

|                 |                                                 |                                            |
|-----------------|-------------------------------------------------|--------------------------------------------|
| Bond precision: | C-C = 0.0048 A                                  | Wavelength=0.71073                         |
| Cell:           | a=12.6872(2)      b=9.5720(2)      c=14.9830(2) | alpha=90      beta=98.300(2)      gamma=90 |
| Temperature:    | 293 K                                           |                                            |
|                 | Calculated                                      | Reported                                   |
| Volume          | 1800.51(5)                                      | 1800.51(5)                                 |
| Space group     | P 21/n                                          | P_21/n                                     |
| Hall group      | -P 2yn                                          | -P_2yn                                     |
| Moiety formula  | C17 H13 Cl N3 O4 Re                             | ?                                          |
| Sum formula     | C17 H13 Cl N3 O4 Re                             | C17 H13 Cl N3 O4 Re                        |
| Mr              | 544.96                                          | 544.95                                     |
| Dx,g cm-3       | 2.010                                           | 2.010                                      |
| Z               | 4                                               | 4                                          |
| Mu (mm-1)       | 6.925                                           | 6.925                                      |
| F000            | 1040.0                                          | 1040.0                                     |
| F000'           | 1037.09                                         |                                            |
| h,k,lmax        | 19,14,22                                        | 19,14,22                                   |
| Nref            | 6806                                            | 6375                                       |
| Tmin,Tmax       | 0.667,0.871                                     | 0.534,1.000                                |
| Tmin'           | 0.495                                           |                                            |

Correction method= # Reported T Limits: Tmin=0.534 Tmax=1.000  
AbsCorr = MULTI-SCAN

Data completeness= 0.937      Theta(max)= 33.010

R(reflections)= 0.0222( 5218)      wR2(reflections)= 0.0650( 6375)

S = 1.189      Npar= 235

---

The following ALERTS were generated. Each ALERT has the format

**test-name\_ALERT\_alert-type\_alert-level.**

Click on the hyperlinks for more details of the test.

---

## ● Alert level G

|                   |                                                  |             |
|-------------------|--------------------------------------------------|-------------|
| PLAT005_ALERT_5_G | No Embedded Refinement Details found in the CIF  | Please Do ! |
| PLAT007_ALERT_5_G | Number of Unrefined Donor-H Atoms .....          | 1 Report    |
| PLAT093_ALERT_1_G | No s.u.'s on H-positions, Refinement Reported as | mixed Check |
| PLAT153_ALERT_1_G | The s.u.'s on the Cell Axes are Equal ..(Note)   | 0.0002 Ang. |
| PLAT180_ALERT_4_G | Check Cell Rounding: # of Values Ending with 0 = | 3 Note      |
| PLAT199_ALERT_1_G | Reported _cell_measurement_temperature ..... (K) | 293 Check   |
| PLAT200_ALERT_1_G | Reported _diffrn_ambient_temperature ..... (K)   | 293 Check   |
| PLAT232_ALERT_2_G | Hirshfeld Test Diff (M-X) Rel -- C11 ..          | 6.5 s.u.    |
| PLAT232_ALERT_2_G | Hirshfeld Test Diff (M-X) Rel -- C16 ..          | 6.8 s.u.    |
| PLAT232_ALERT_2_G | Hirshfeld Test Diff (M-X) Rel -- C17 ..          | 8.1 s.u.    |
| PLAT720_ALERT_4_G | Number of Unusual/Non-Standard Labels .....      | 1 Note      |

---

0 **ALERT level A** = Most likely a serious problem - resolve or explain  
0 **ALERT level B** = A potentially serious problem, consider carefully  
0 **ALERT level C** = Check. Ensure it is not caused by an omission or oversight  
11 **ALERT level G** = General information/check it is not something unexpected

4 ALERT type 1 CIF construction/syntax error, inconsistent or missing data  
3 ALERT type 2 Indicator that the structure model may be wrong or deficient  
0 ALERT type 3 Indicator that the structure quality may be low  
2 ALERT type 4 Improvement, methodology, query or suggestion  
2 ALERT type 5 Informative message, check

---

It is advisable to attempt to resolve as many as possible of the alerts in all categories. Often the minor alerts point to easily fixed oversights, errors and omissions in your CIF or refinement strategy, so attention to these fine details can be worthwhile. In order to resolve some of the more serious problems it may be necessary to carry out additional measurements or structure refinements. However, the purpose of your study may justify the reported deviations and the more serious of these should normally be commented upon in the discussion or experimental section of a paper or in the "special\_details" fields of the CIF. checkCIF was carefully designed to identify outliers and unusual parameters, but every test has its limitations and alerts that are not important in a particular case may appear. Conversely, the absence of alerts does not guarantee there are no aspects of the results needing attention. It is up to the individual to critically assess their own results and, if necessary, seek expert advice.

### Publication of your CIF in IUCr journals

A basic structural check has been run on your CIF. These basic checks will be run on all CIFs submitted for publication in IUCr journals (*Acta Crystallographica*, *Journal of Applied Crystallography*, *Journal of Synchrotron Radiation*); however, if you intend to submit to *Acta Crystallographica Section C* or *E* or *IUCrData*, you should make sure that full publication checks are run on the final version of your CIF prior to submission.

### Publication of your CIF in other journals

Please refer to the *Notes for Authors* of the relevant journal for any special instructions relating to CIF submission.

---

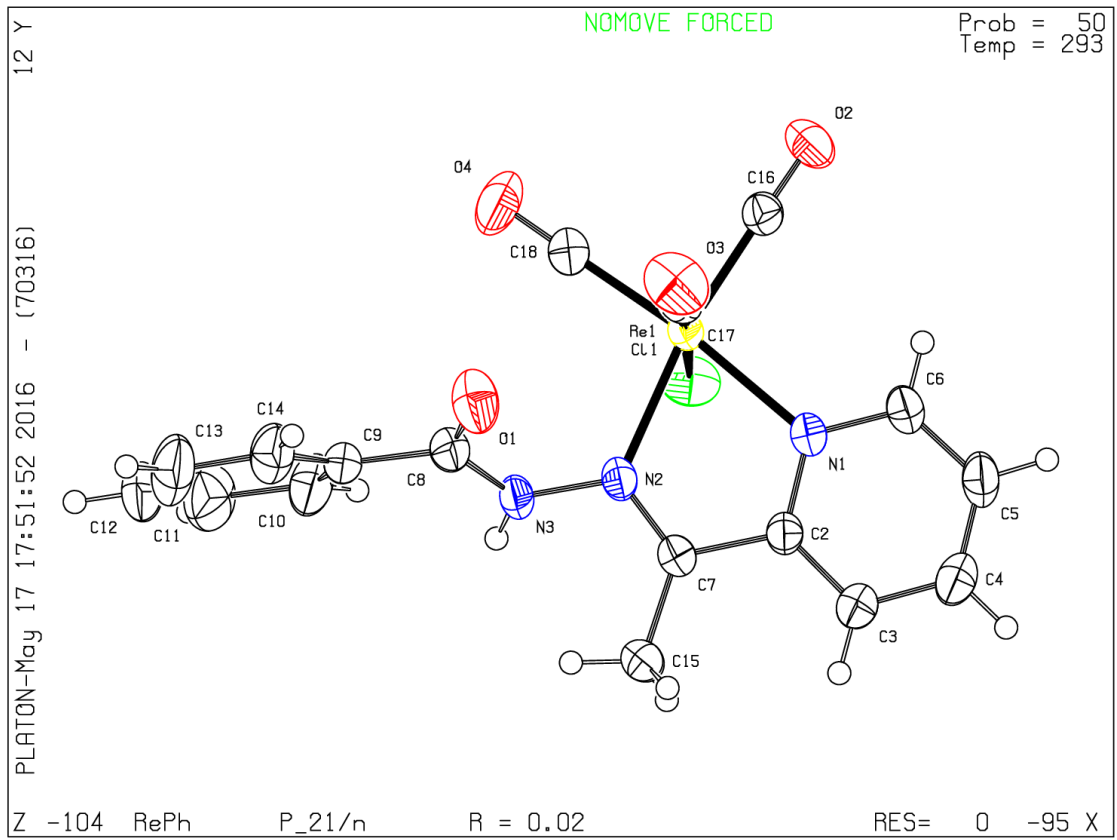

## checkCIF/PLATON report

You have not supplied any structure factors. As a result the full set of tests cannot be run.

THIS REPORT IS FOR GUIDANCE ONLY. IF USED AS PART OF A REVIEW PROCEDURE FOR PUBLICATION, IT SHOULD NOT REPLACE THE EXPERTISE OF AN EXPERIENCED CRYSTALLOGRAPHIC REFEREE.

No syntax errors found.      CIF dictionary      Interpreting this report

### Datablock: Re\_pCl complex (2a)

---

Bond precision:    C-C = 0.0039 A

Wavelength=0.71073

Cell:                a=8.7687(4)                b=11.1002(5)                c=12.9282(5)  
                      alpha=113.002(4)        beta=97.163(4)        gamma=93.603(4)  
Temperature:        200 K

|                | Calculated                         | Reported               |
|----------------|------------------------------------|------------------------|
| Volume         | 1140.66(9)                         | 1140.66(9)             |
| Space group    | P -1                               | P -1                   |
| Hall group     | -P 1                               | -P 1                   |
| Moiety formula | C17 H12 Cl2 N3 O4 Re, C2<br>H6 O S | C19 H18 Cl2 N3 O5 Re S |
| Sum formula    | C19 H18 Cl2 N3 O5 Re S             | C19 H18 Cl2 N3 O5 Re S |
| Mr             | 657.53                             | 657.52                 |
| Dx,g cm-3      | 1.914                              | 1.914                  |
| Z              | 2                                  | 2                      |
| Mu (mm-1)      | 5.688                              | 5.688                  |
| F000           | 636.0                              | 636.0                  |
| F000'          | 635.10                             |                        |
| h,k,lmax       | 13,16,19                           | 13,16,19               |
| Nref           | 8528                               | 7953                   |
| Tmin,Tmax      | 0.626,0.892                        | 0.555,1.000            |
| Tmin'          | 0.422                              |                        |

Correction method= # Reported T Limits: Tmin=0.555 Tmax=1.000  
AbsCorr = MULTI-SCAN

Data completeness= 0.933

Theta(max)= 32.880

R(reflections)= 0.0255( 7050)

wR2(reflections)= 0.0508( 7953)

S = 1.061

Npar= 283

---

The following ALERTS were generated. Each ALERT has the format

**test-name\_ALERT\_alert-type\_alert-level.**

Click on the hyperlinks for more details of the test.

---

● **Alert level G**

|                   |                                                  |                 |
|-------------------|--------------------------------------------------|-----------------|
| PLAT005_ALERT_5_G | No Embedded Refinement Details found in the CIF  | Please Do !     |
| PLAT007_ALERT_5_G | Number of Unrefined Donor-H Atoms .....          | 1 Report        |
| PLAT042_ALERT_1_G | Calc. and Reported MoietyFormula Strings Differ  | Please Check    |
| PLAT093_ALERT_1_G | No s.u.'s on H-positions, Refinement Reported as | mixed Check     |
| PLAT154_ALERT_1_G | The s.u.'s on the Cell Angles are Equal ..(Note) | 0.004 Degree    |
| PLAT232_ALERT_2_G | Hirshfeld Test Diff (M-X) Re1 -- C16 ..          | 6.9 s.u.        |
| PLAT232_ALERT_2_G | Hirshfeld Test Diff (M-X) Re1 -- C17 ..          | 6.0 s.u.        |
| PLAT232_ALERT_2_G | Hirshfeld Test Diff (M-X) Re1 -- C18 ..          | 7.3 s.u.        |
| PLAT720_ALERT_4_G | Number of Unusual/Non-Standard Labels .....      | 1 Note          |
| PLAT721_ALERT_1_G | Bond Calc 4.95000, Rep 0.86000 Dev...            | 4.09 Ang.       |
|                   | N3 -H3 1.555 1.555 .....                         | Bond # 20 Check |
| PLAT722_ALERT_1_G | Angle Calc 144.00, Rep 120.60 Dev...             | 23.40 Degree    |
|                   | C8 -N3 -H3 1.555 1.555 1.555 #                   | 26              |
| PLAT722_ALERT_1_G | Angle Calc 38.00, Rep 120.60 Dev...              | 82.60 Degree    |
|                   | N2 -N3 -H3 1.555 1.555 1.555 #                   | 27              |

---

0 **ALERT level A** = Most likely a serious problem - resolve or explain  
0 **ALERT level B** = A potentially serious problem, consider carefully  
0 **ALERT level C** = Check. Ensure it is not caused by an omission or oversight  
12 **ALERT level G** = General information/check it is not something unexpected

6 ALERT type 1 CIF construction/syntax error, inconsistent or missing data  
3 ALERT type 2 Indicator that the structure model may be wrong or deficient  
0 ALERT type 3 Indicator that the structure quality may be low  
1 ALERT type 4 Improvement, methodology, query or suggestion  
2 ALERT type 5 Informative message, check

---

---

It is advisable to attempt to resolve as many as possible of the alerts in all categories. Often the minor alerts point to easily fixed oversights, errors and omissions in your CIF or refinement strategy, so attention to these fine details can be worthwhile. In order to resolve some of the more serious problems it may be necessary to carry out additional measurements or structure refinements. However, the purpose of your study may justify the reported deviations and the more serious of these should normally be commented upon in the discussion or experimental section of a paper or in the "special\_details" fields of the CIF. checkCIF was carefully designed to identify outliers and unusual parameters, but every test has its limitations and alerts that are not important in a particular case may appear. Conversely, the absence of alerts does not guarantee there are no aspects of the results needing attention. It is up to the individual to critically assess their own results and, if necessary, seek expert advice.

### **Publication of your CIF in IUCr journals**

A basic structural check has been run on your CIF. These basic checks will be run on all CIFs submitted for publication in IUCr journals (*Acta Crystallographica*, *Journal of Applied Crystallography*, *Journal of Synchrotron Radiation*); however, if you intend to submit to *Acta Crystallographica Section C* or *E* or *IUCrData*, you should make sure that full publication checks are run on the final version of your CIF prior to submission.

### **Publication of your CIF in other journals**

Please refer to the *Notes for Authors* of the relevant journal for any special instructions relating to CIF submission.

---

**PLATON version of 06/05/2016; check.def file version of 05/05/2016**

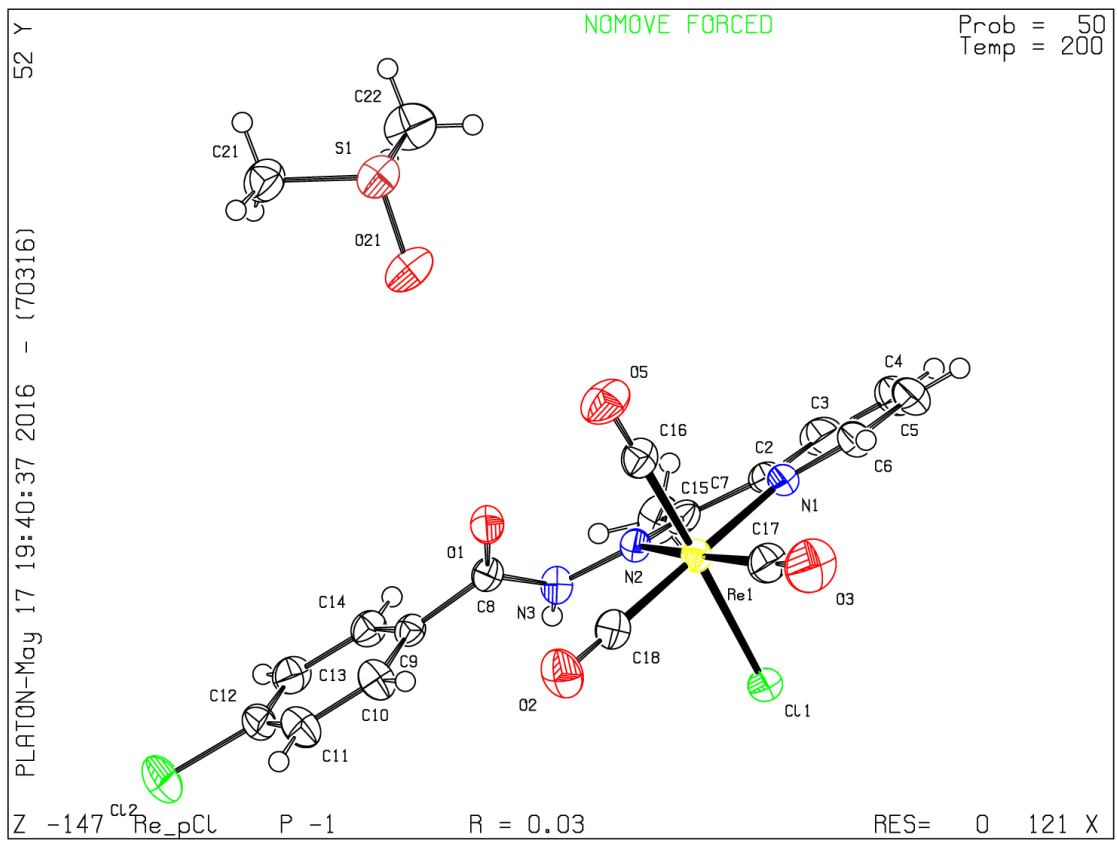

## checkCIF/PLATON report

You have not supplied any structure factors. As a result the full set of tests cannot be run.

THIS REPORT IS FOR GUIDANCE ONLY. IF USED AS PART OF A REVIEW PROCEDURE FOR PUBLICATION, IT SHOULD NOT REPLACE THE EXPERTISE OF AN EXPERIENCED CRYSTALLOGRAPHIC REFEREE.

No syntax errors found.      CIF dictionary      Interpreting this report

### Datablock: RepNO2 complex (3a)

---

Bond precision:    C-C = 0.0072 A

Wavelength=0.71073

Cell:                a=8.8972(5)                b=11.1200(6)                c=12.9995(6)  
                      alpha=112.409(4)        beta=96.989(4)        gamma=93.490(4)  
Temperature:        293 K

|                | Calculated                        | Reported              |
|----------------|-----------------------------------|-----------------------|
| Volume         | 1172.08(11)                       | 1172.08(11)           |
| Space group    | P -1                              | P-1                   |
| Hall group     | -P 1                              | -P1                   |
| Moiety formula | C17 H12 Cl N4 O6 Re, C2 H6<br>O S | ?                     |
| Sum formula    | C19 H18 Cl N4 O7 Re S             | C19 H18 Cl N4 O7 Re S |
| Mr             | 668.09                            | 668.08                |
| Dx, g cm-3     | 1.893                             | 1.893                 |
| Z              | 2                                 | 2                     |
| Mu (mm-1)      | 5.434                             | 5.434                 |
| F000           | 648.0                             | 648.0                 |
| F000'          | 646.83                            |                       |
| h,k,lmax       | 12,15,18                          | 11,15,17              |
| Nref           | 6568                              | 5446                  |
| Tmin,Tmax      | 0.729,0.897                       | 0.669,1.000           |
| Tmin'          | 0.575                             |                       |

Correction method= # Reported T Limits: Tmin=0.669 Tmax=1.000  
AbsCorr = MULTI-SCAN

Data completeness= 0.829

Theta(max)= 29.550

R(reflections)= 0.0297( 4833)

wR2(reflections)= 0.0715( 5446)

S = 1.082

Npar= 300

---



The following ALERTS were generated. Each ALERT has the format

**test-name\_ALERT\_alert-type\_alert-level.**

Click on the hyperlinks for more details of the test.

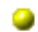

### Alert level C

|                   |             |           |                                 |           |          |
|-------------------|-------------|-----------|---------------------------------|-----------|----------|
| PLAT242_ALERT_2_C | Low         | 'MainMol' | Ueq as Compared to Neighbors of | N4        | Check    |
| PLAT751_ALERT_4_C | Bond        | Calc      | 0.93000, Rep 0.927(4) .....     | Senseless | s.u.     |
|                   | N3 -HN2     | 1.555     | 1.555 .....                     | Bond #    | 21 Check |
| PLAT752_ALERT_4_C | Angle       | Calc      | 117.00, Rep 117.3(3) .....      | Senseless | s.u.     |
|                   | C8 -N3 -HN2 | 1.555     | 1.555 1.555                     | #         | 26       |
| PLAT752_ALERT_4_C | Angle       | Calc      | 123.00, Rep 122.5(3) .....      | Senseless | s.u.     |
|                   | N2 -N3 -HN2 | 1.555     | 1.555 1.555                     | #         | 27       |

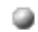

### Alert level G

|                   |                                                  |            |              |
|-------------------|--------------------------------------------------|------------|--------------|
| PLAT005_ALERT_5_G | No Embedded Refinement Details found             | in the CIF | Please Do !  |
| PLAT007_ALERT_5_G | Number of Unrefined Donor-H Atoms .....          |            | 1 Report     |
| PLAT093_ALERT_1_G | No s.u.'s on H-positions, Refinement Reported as |            | mixed Check  |
| PLAT154_ALERT_1_G | The s.u.'s on the Cell Angles are Equal ..(Note) |            | 0.004 Degree |
| PLAT199_ALERT_1_G | Reported _cell_measurement_temperature .....     | (K)        | 293 Check    |
| PLAT200_ALERT_1_G | Reported _diffrn_ambient_temperature .....       | (K)        | 293 Check    |
| PLAT380_ALERT_4_G | Incorrectly? Oriented X(sp2)-Methyl Moiety ..... |            | C15 Check    |
| PLAT720_ALERT_4_G | Number of Unusual/Non-Standard Labels .....      |            | 1 Note       |

---

0 **ALERT level A** = Most likely a serious problem - resolve or explain  
0 **ALERT level B** = A potentially serious problem, consider carefully  
4 **ALERT level C** = Check. Ensure it is not caused by an omission or oversight  
8 **ALERT level G** = General information/check it is not something unexpected

4 ALERT type 1 CIF construction/syntax error, inconsistent or missing data  
1 ALERT type 2 Indicator that the structure model may be wrong or deficient  
0 ALERT type 3 Indicator that the structure quality may be low  
5 ALERT type 4 Improvement, methodology, query or suggestion  
2 ALERT type 5 Informative message, check

---

---

It is advisable to attempt to resolve as many as possible of the alerts in all categories. Often the minor alerts point to easily fixed oversights, errors and omissions in your CIF or refinement strategy, so attention to these fine details can be worthwhile. In order to resolve some of the more serious problems it may be necessary to carry out additional measurements or structure refinements. However, the purpose of your study may justify the reported deviations and the more serious of these should normally be commented upon in the discussion or experimental section of a paper or in the "special\_details" fields of the CIF. checkCIF was carefully designed to identify outliers and unusual parameters, but every test has its limitations and alerts that are not important in a particular case may appear. Conversely, the absence of alerts does not guarantee there are no aspects of the results needing attention. It is up to the individual to critically assess their own results and, if necessary, seek expert advice.

### **Publication of your CIF in IUCr journals**

A basic structural check has been run on your CIF. These basic checks will be run on all CIFs submitted for publication in IUCr journals (*Acta Crystallographica*, *Journal of Applied Crystallography*, *Journal of Synchrotron Radiation*); however, if you intend to submit to *Acta Crystallographica Section C* or *E* or *IUCrData*, you should make sure that full publication checks are run on the final version of your CIF prior to submission.

### **Publication of your CIF in other journals**

Please refer to the *Notes for Authors* of the relevant journal for any special instructions relating to CIF submission.

---

**PLATON version of 06/05/2016; check.def file version of 05/05/2016**

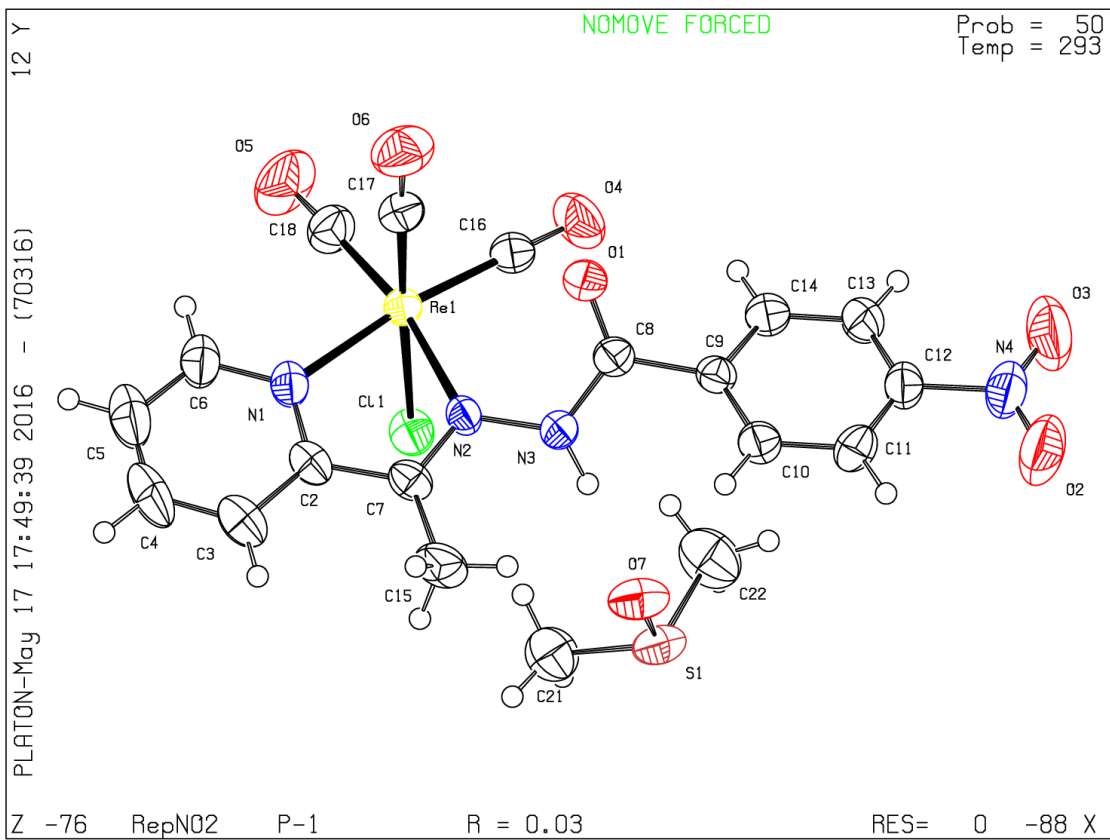

Supplement: c6nj00050a1.pdf [file c6nj00050a1.pdf]
